# Supplementary material
Source: ML conference proceedings conference paper supplement (https://openreview.net/forum?id=n0WDVWqgzC)

## Mean Task Correlations

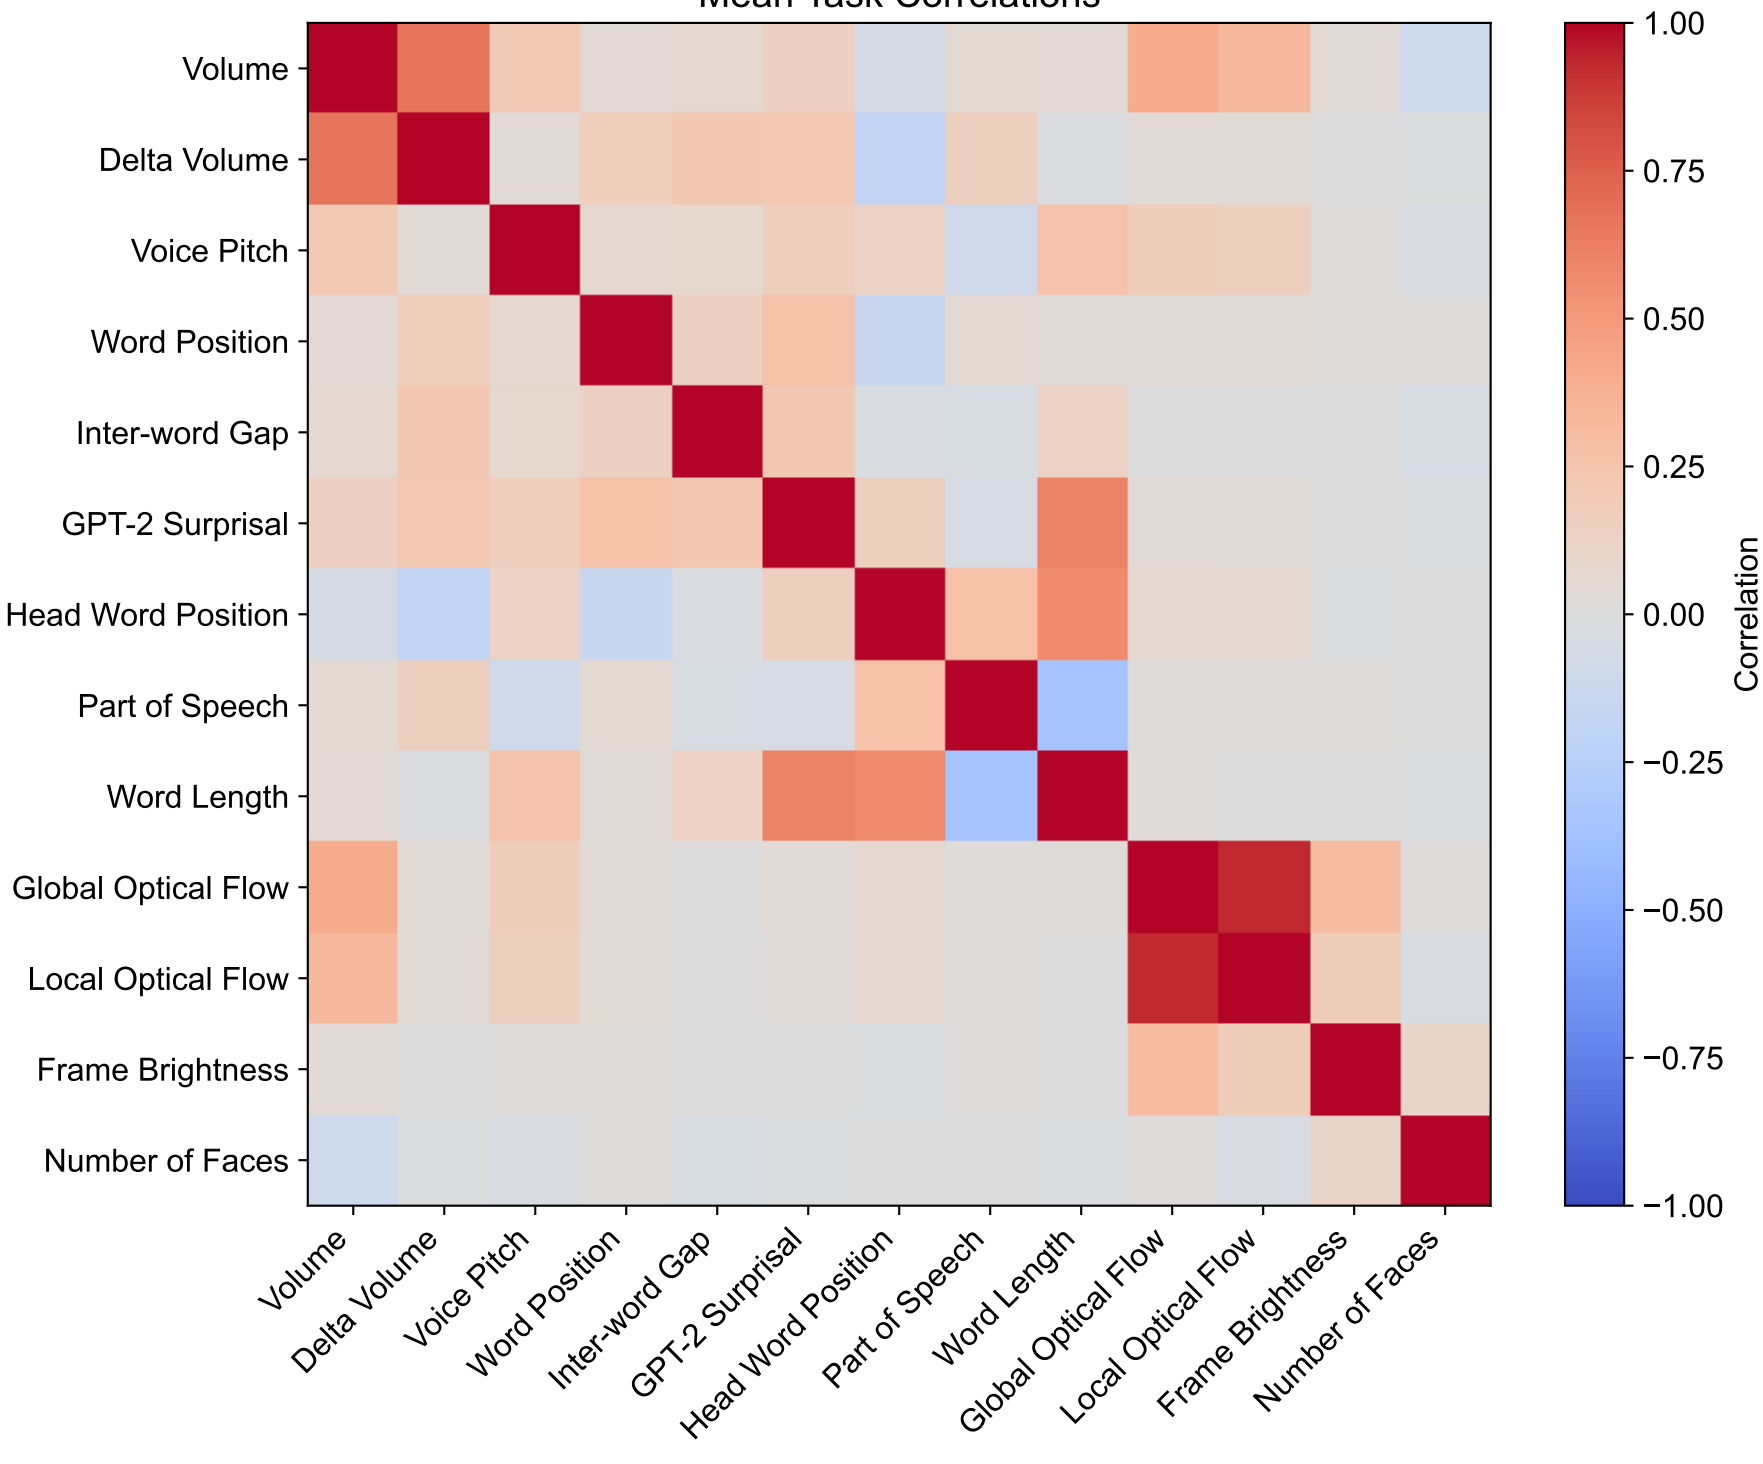

Supplement: supplementary_material [file task_correlations.pdf › neuroprobe_iclr_2026_anonymized-master/analyses/figures/task_correlations.pdf]

Task coverage for btbank10\_0 (cars-2)

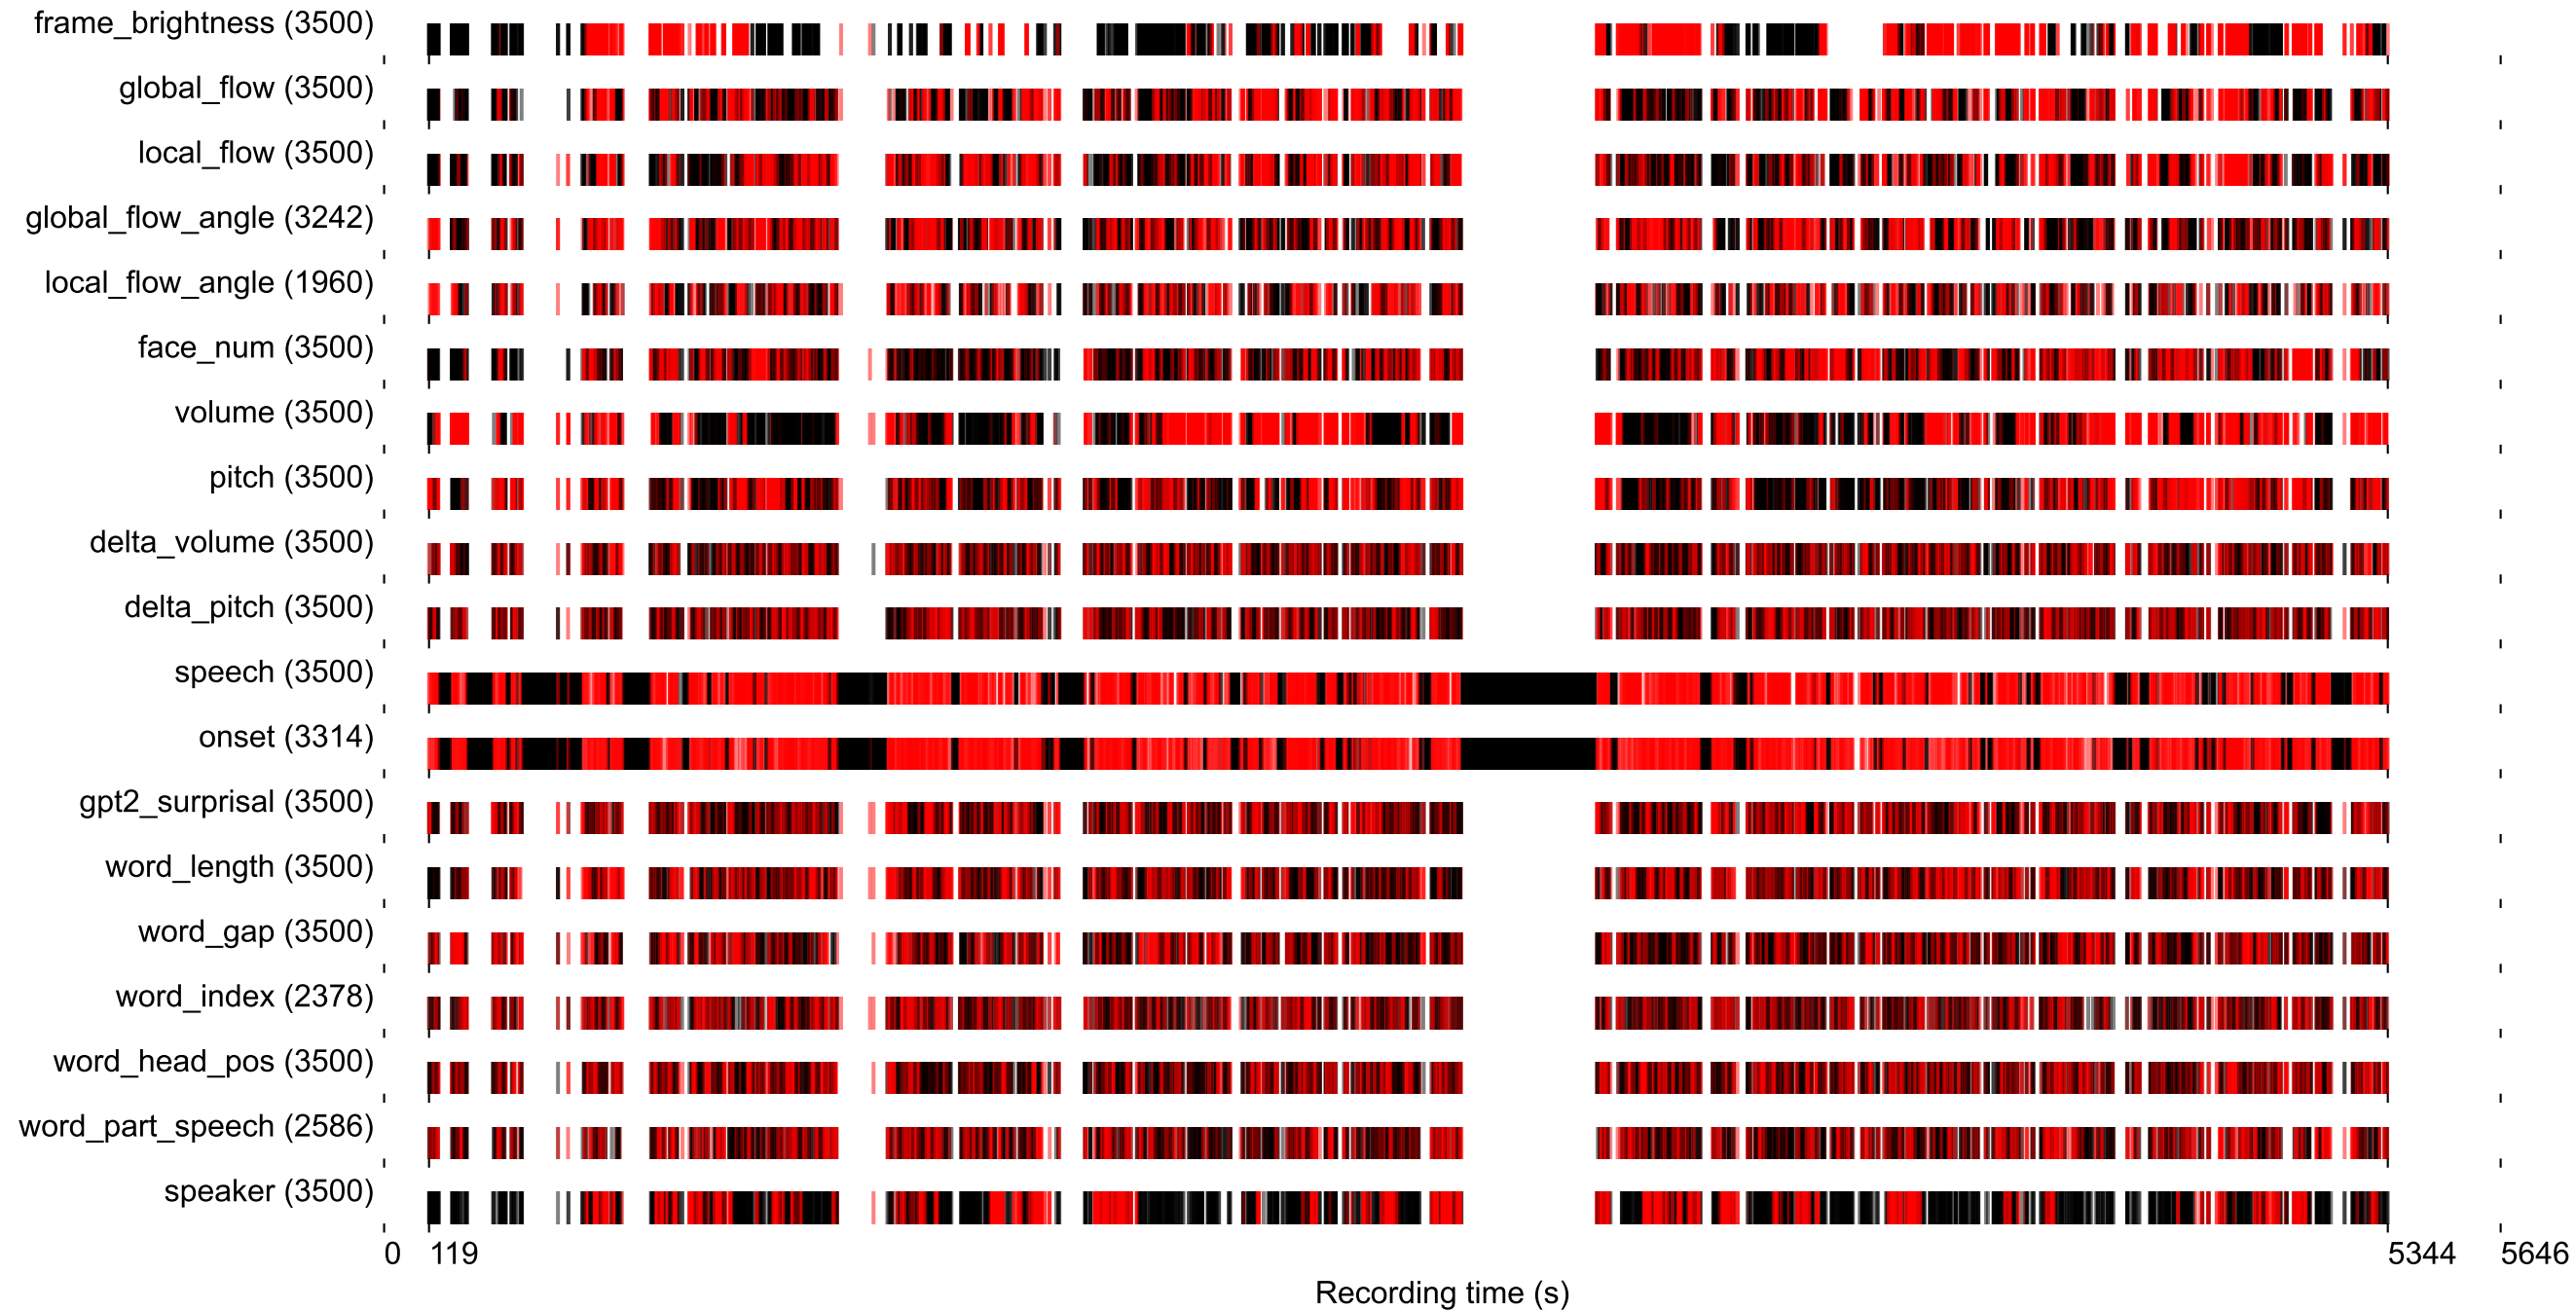

Supplement: supplementary_material [file btbank10_0_cars-2.pdf › neuroprobe_iclr_2026_anonymized-master/analyses/task_coverage_of_sessions/btbank10_0_cars-2.pdf]

Task coverage for btbank10\_1 (spider-man-far-from-home)

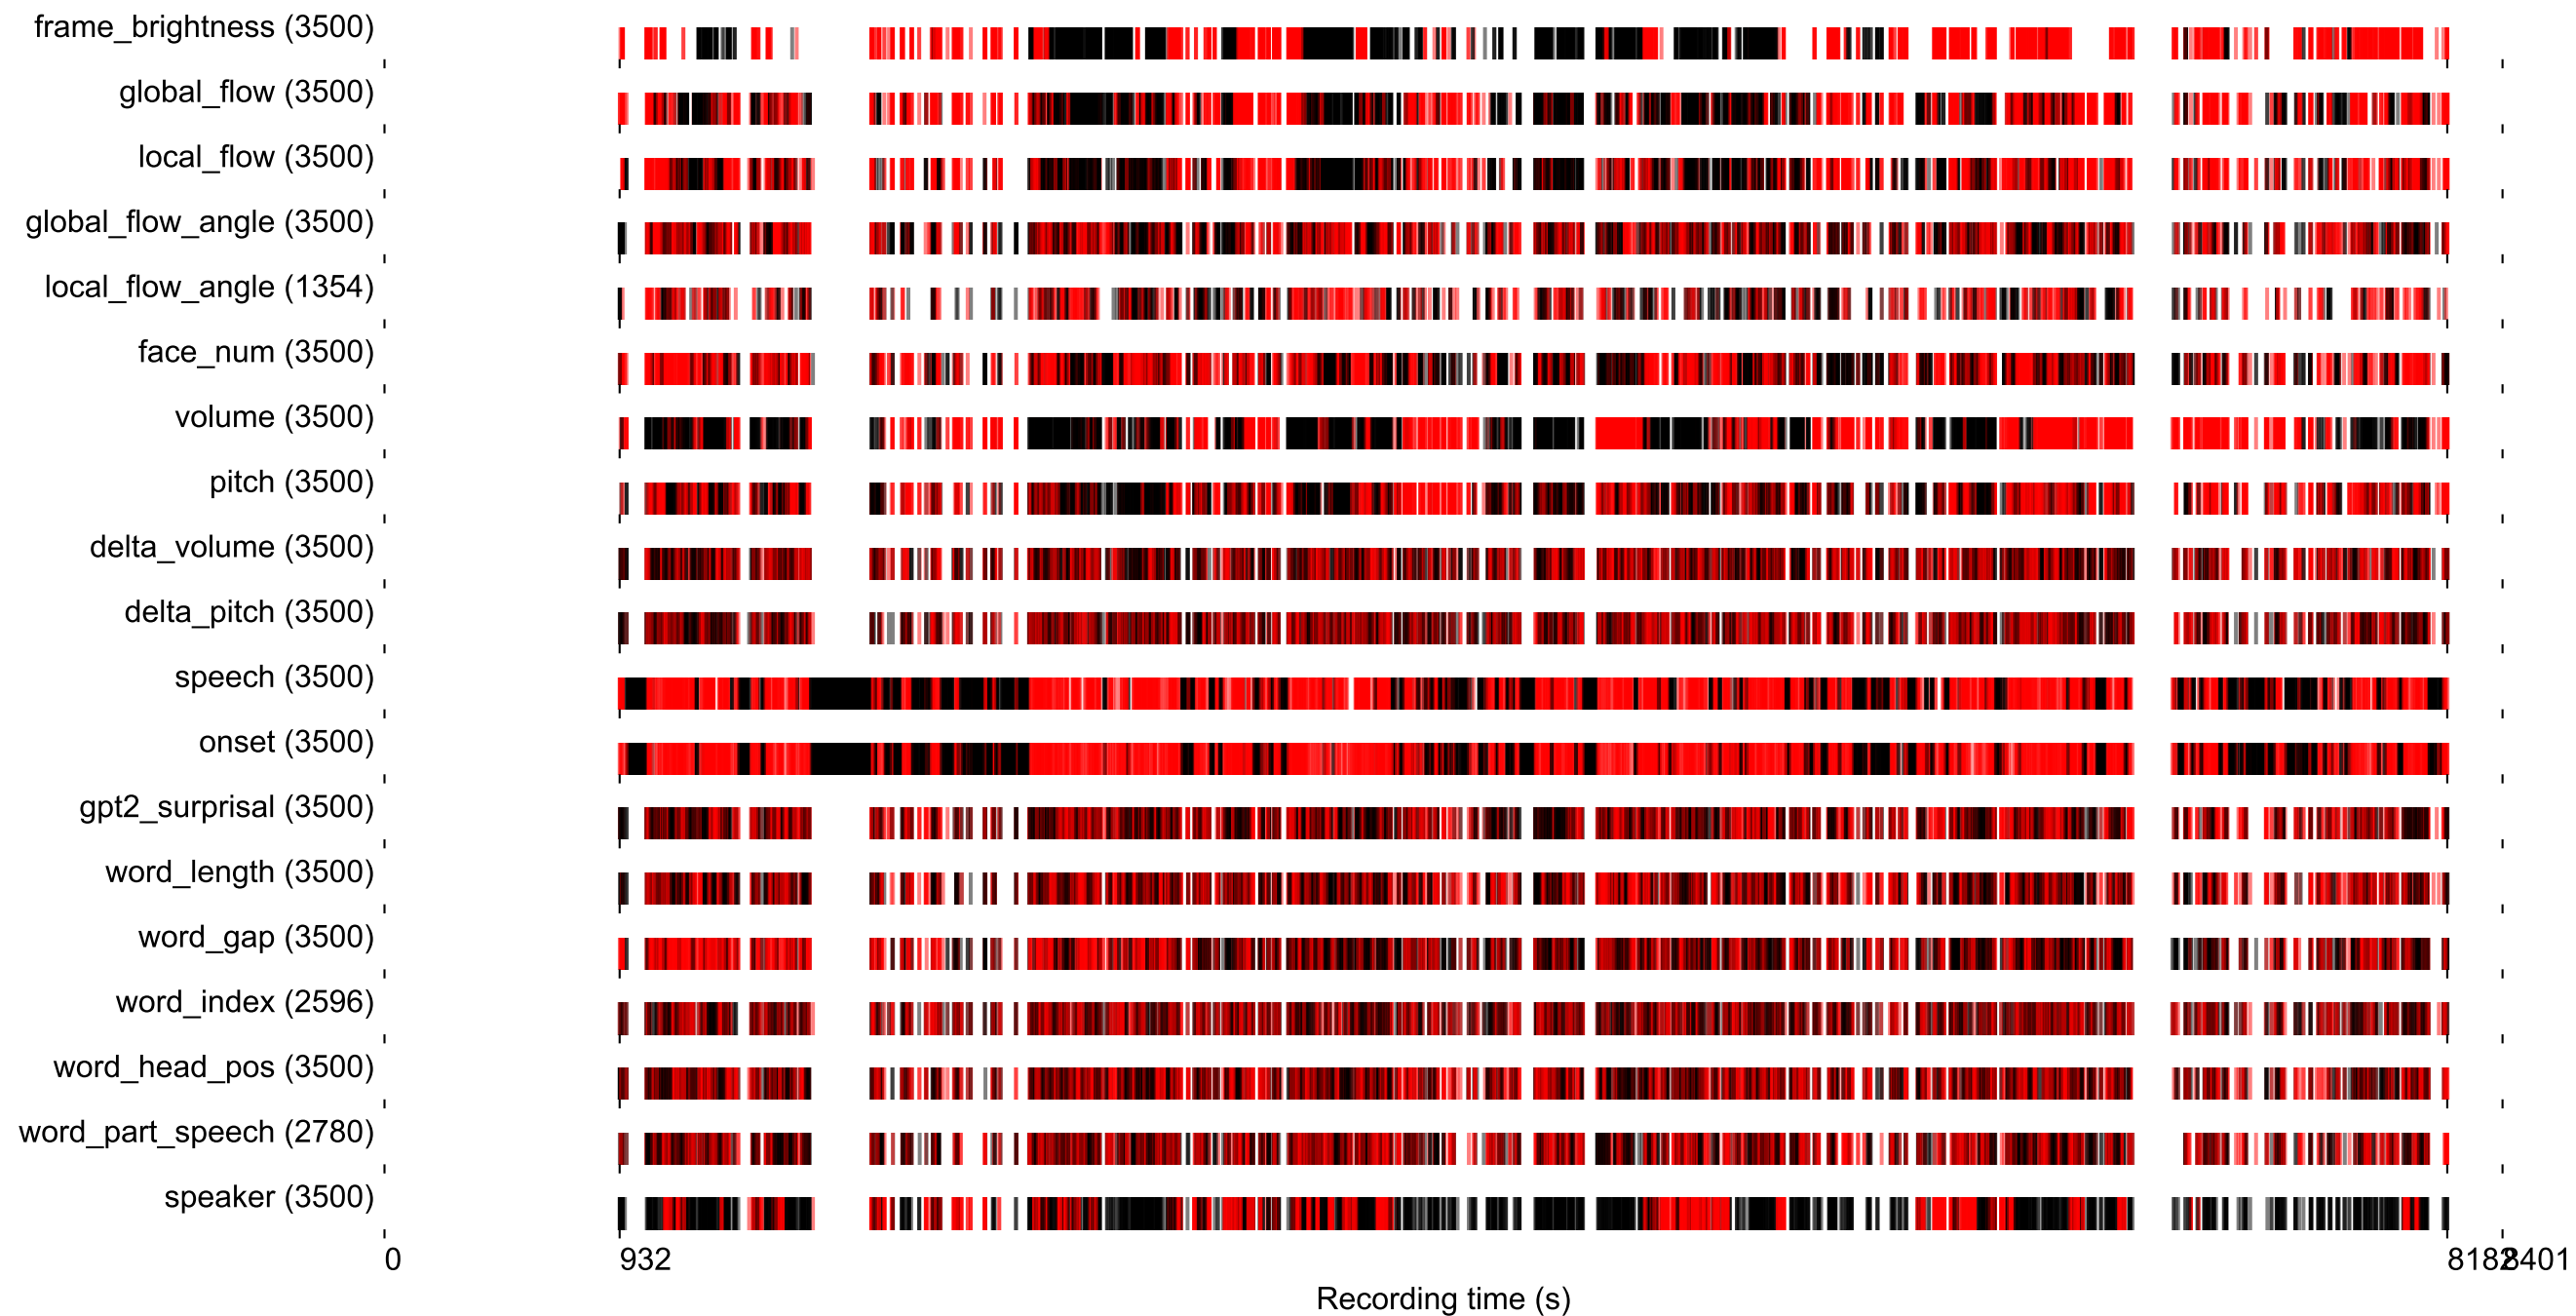

Supplement: supplementary_material [file btbank10_1_spider-man-far-from-home.pdf › neuroprobe_iclr_2026_anonymized-master/analyses/task_coverage_of_sessions/btbank10_1_spider-man-far-from-home.pdf]

Task coverage for btbank1\_1 (the-martian)

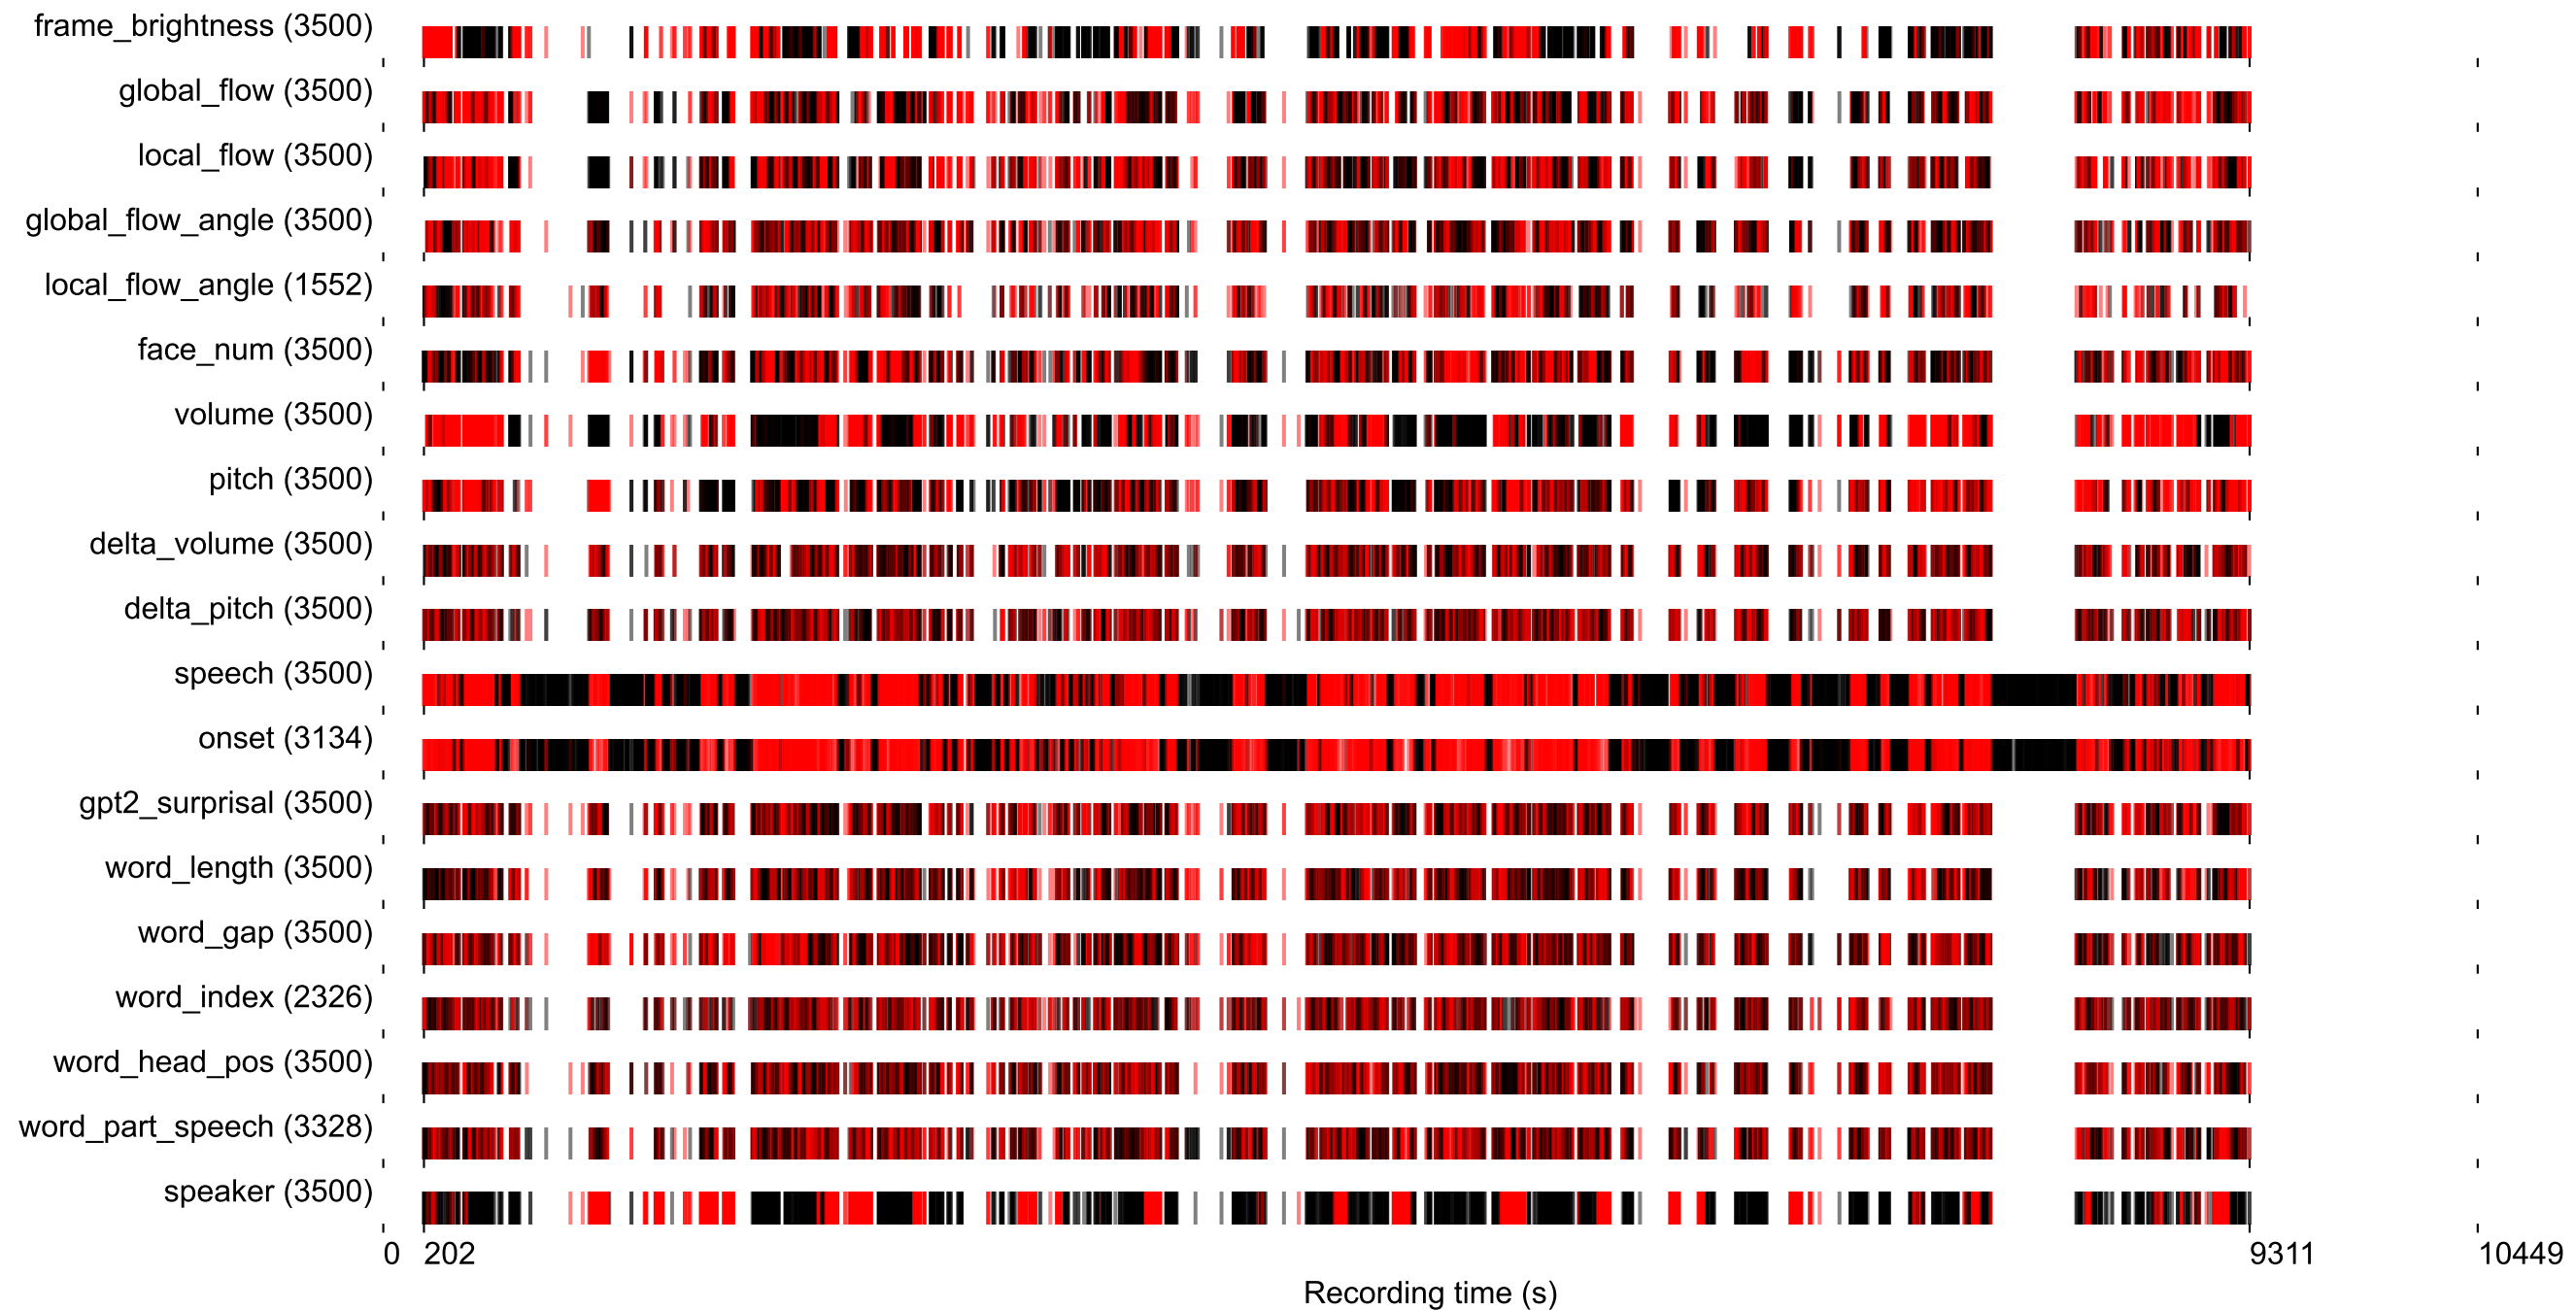

Supplement: supplementary_material [file btbank1_1_the-martian.pdf › neuroprobe_iclr_2026_anonymized-master/analyses/task_coverage_of_sessions/btbank1_1_the-martian.pdf]

Task coverage for btbank1\_2 (thor-ragnarok)

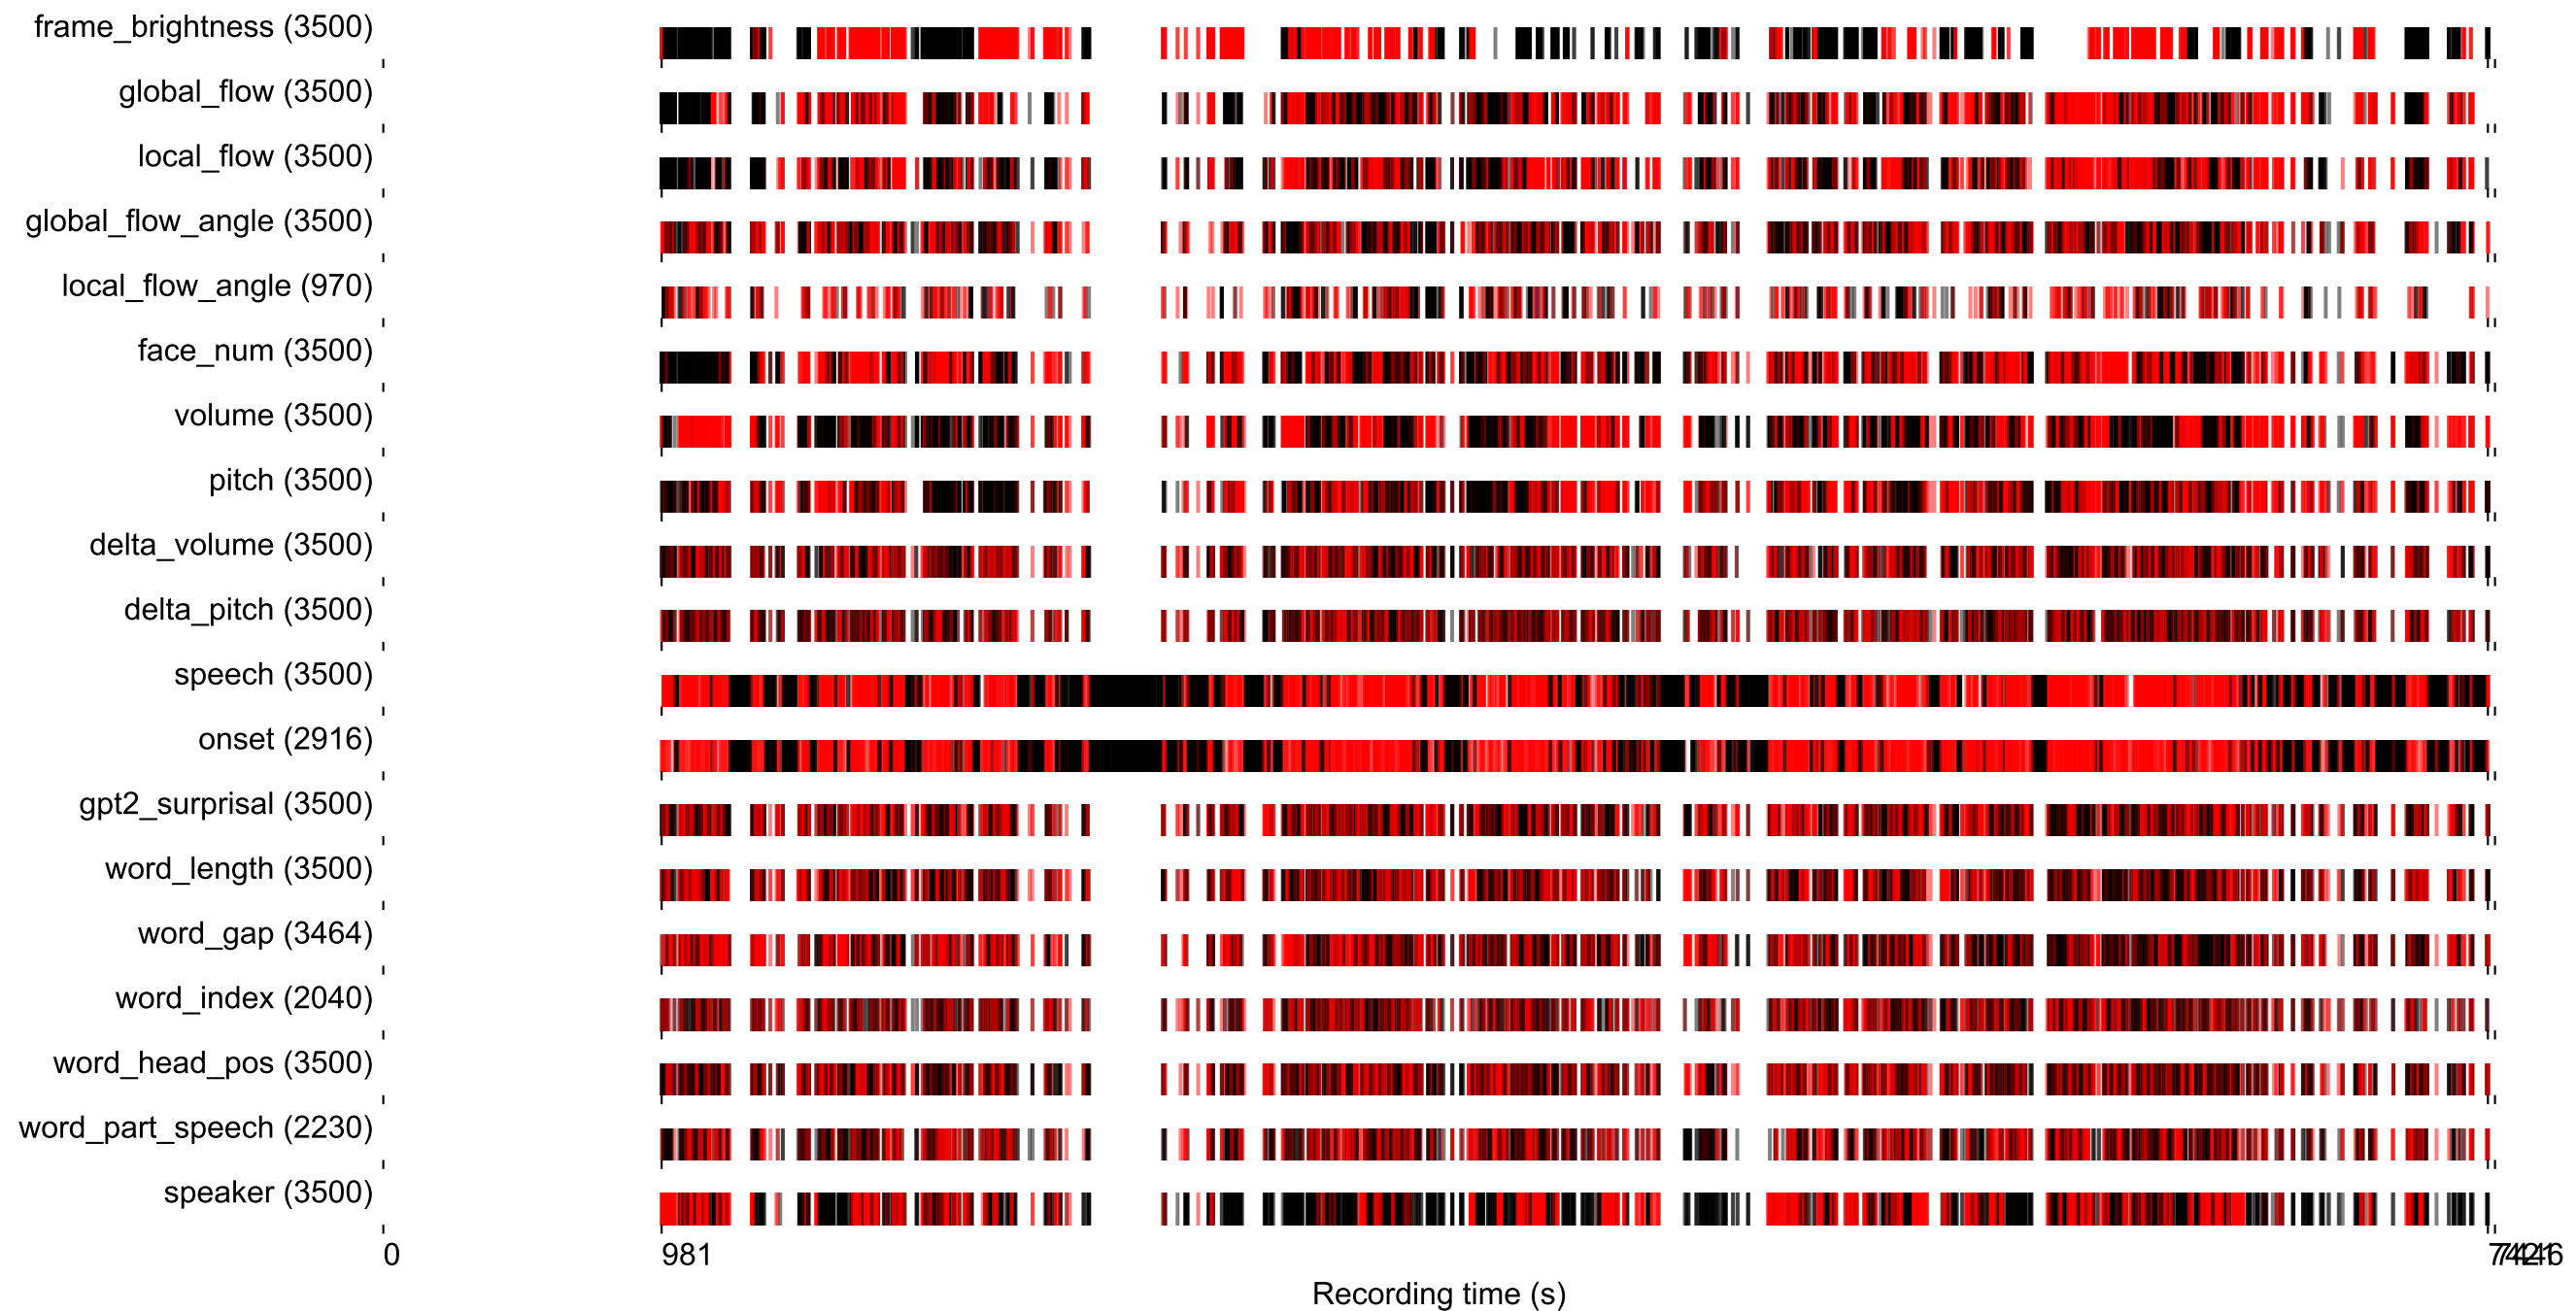

Supplement: supplementary_material [file btbank1_2_thor-ragnarok.pdf › neuroprobe_iclr_2026_anonymized-master/analyses/task_coverage_of_sessions/btbank1_2_thor-ragnarok.pdf]

Task coverage for btbank2\_0 (venom)

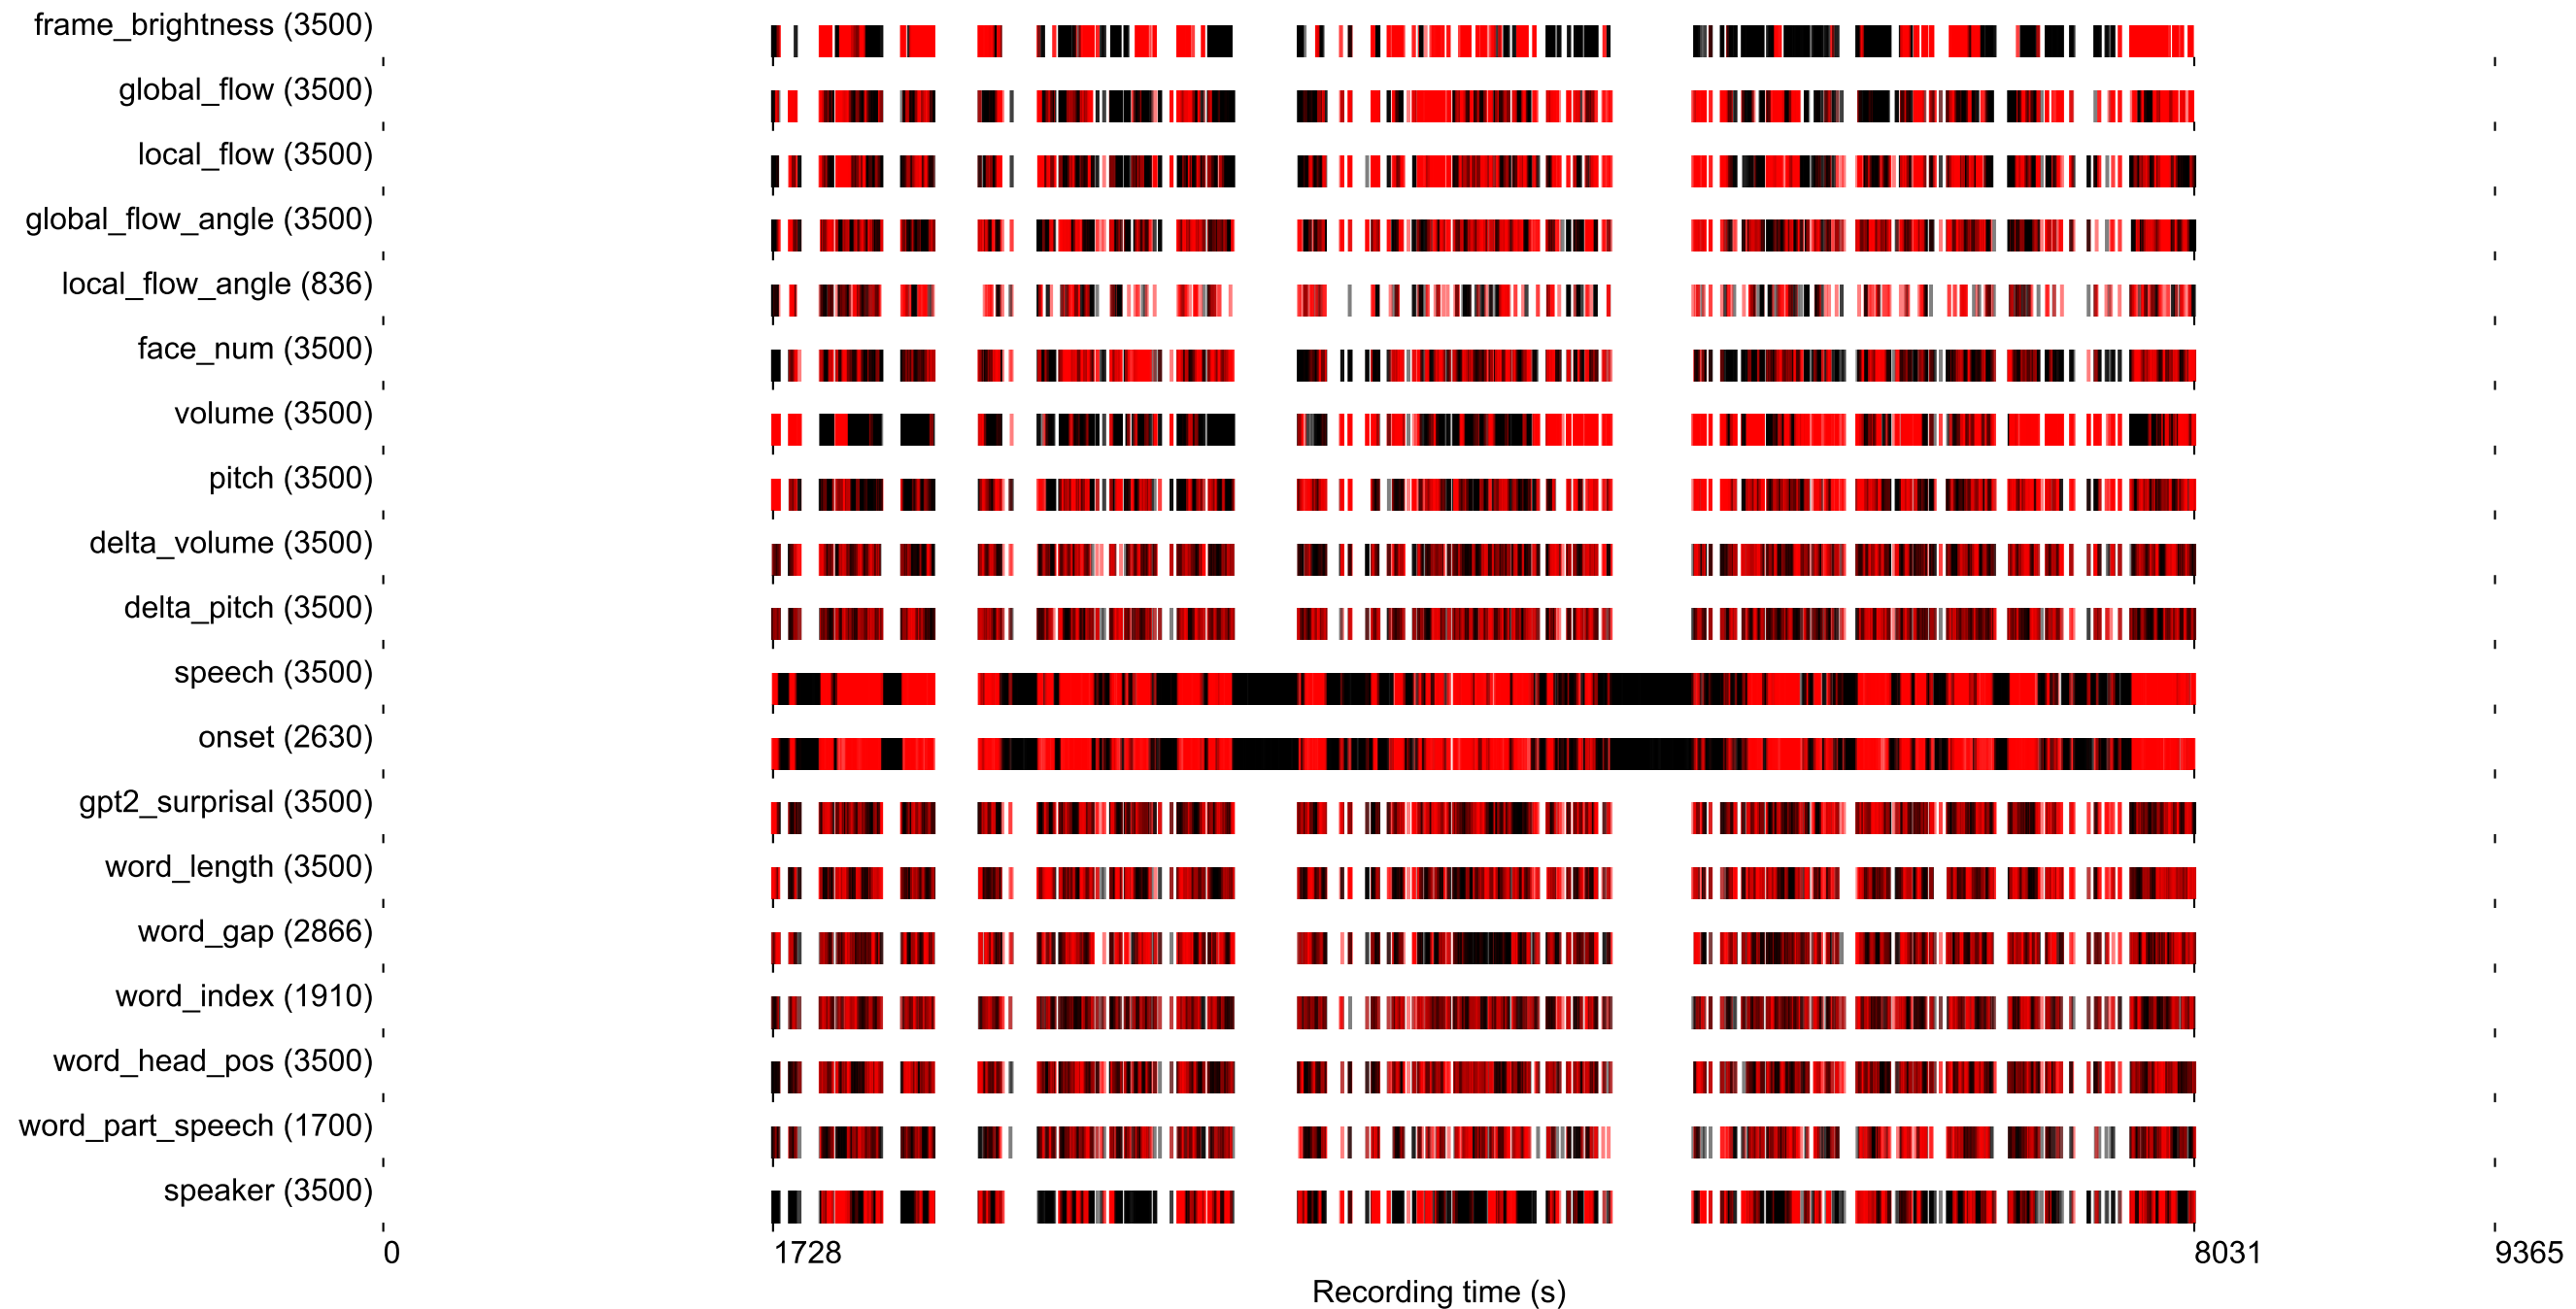

Supplement: supplementary_material [file btbank2_0_venom.pdf › neuroprobe_iclr_2026_anonymized-master/analyses/task_coverage_of_sessions/btbank2_0_venom.pdf]

Task coverage for btbank2\_4 (avengers-infinity-war)

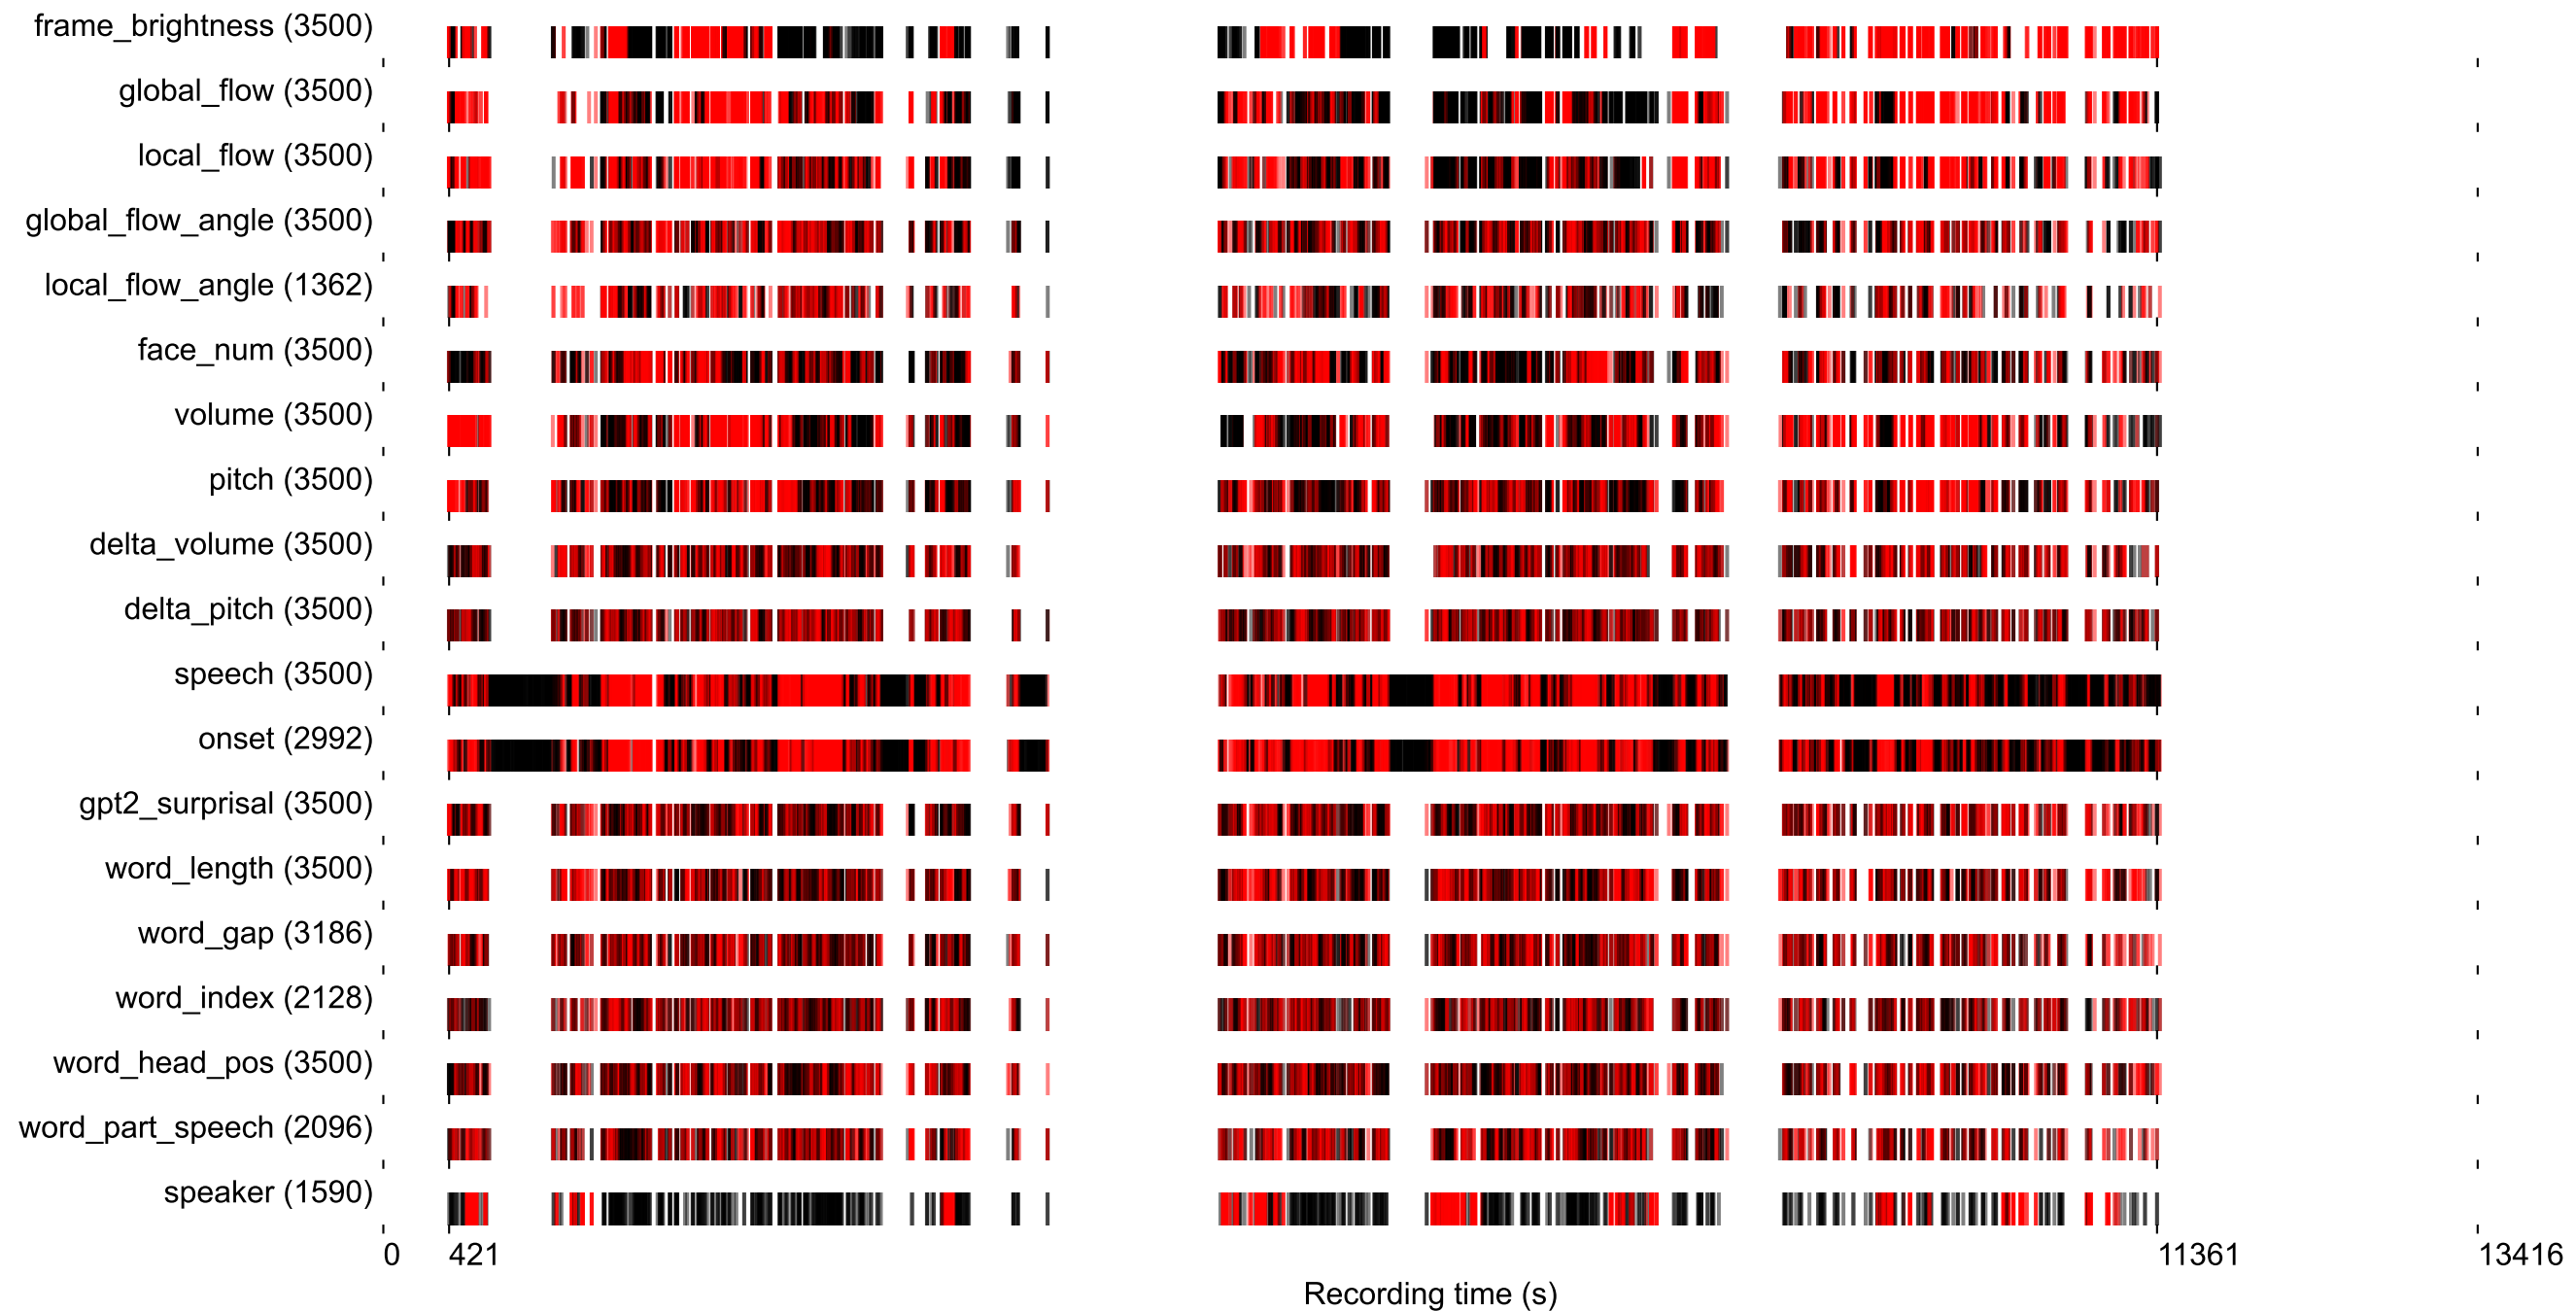

Supplement: supplementary_material [file btbank2_4_avengers-infinity-war.pdf › neuroprobe_iclr_2026_anonymized-master/analyses/task_coverage_of_sessions/btbank2_4_avengers-infinity-war.pdf]

Task coverage for btbank3\_0 (cars-2)

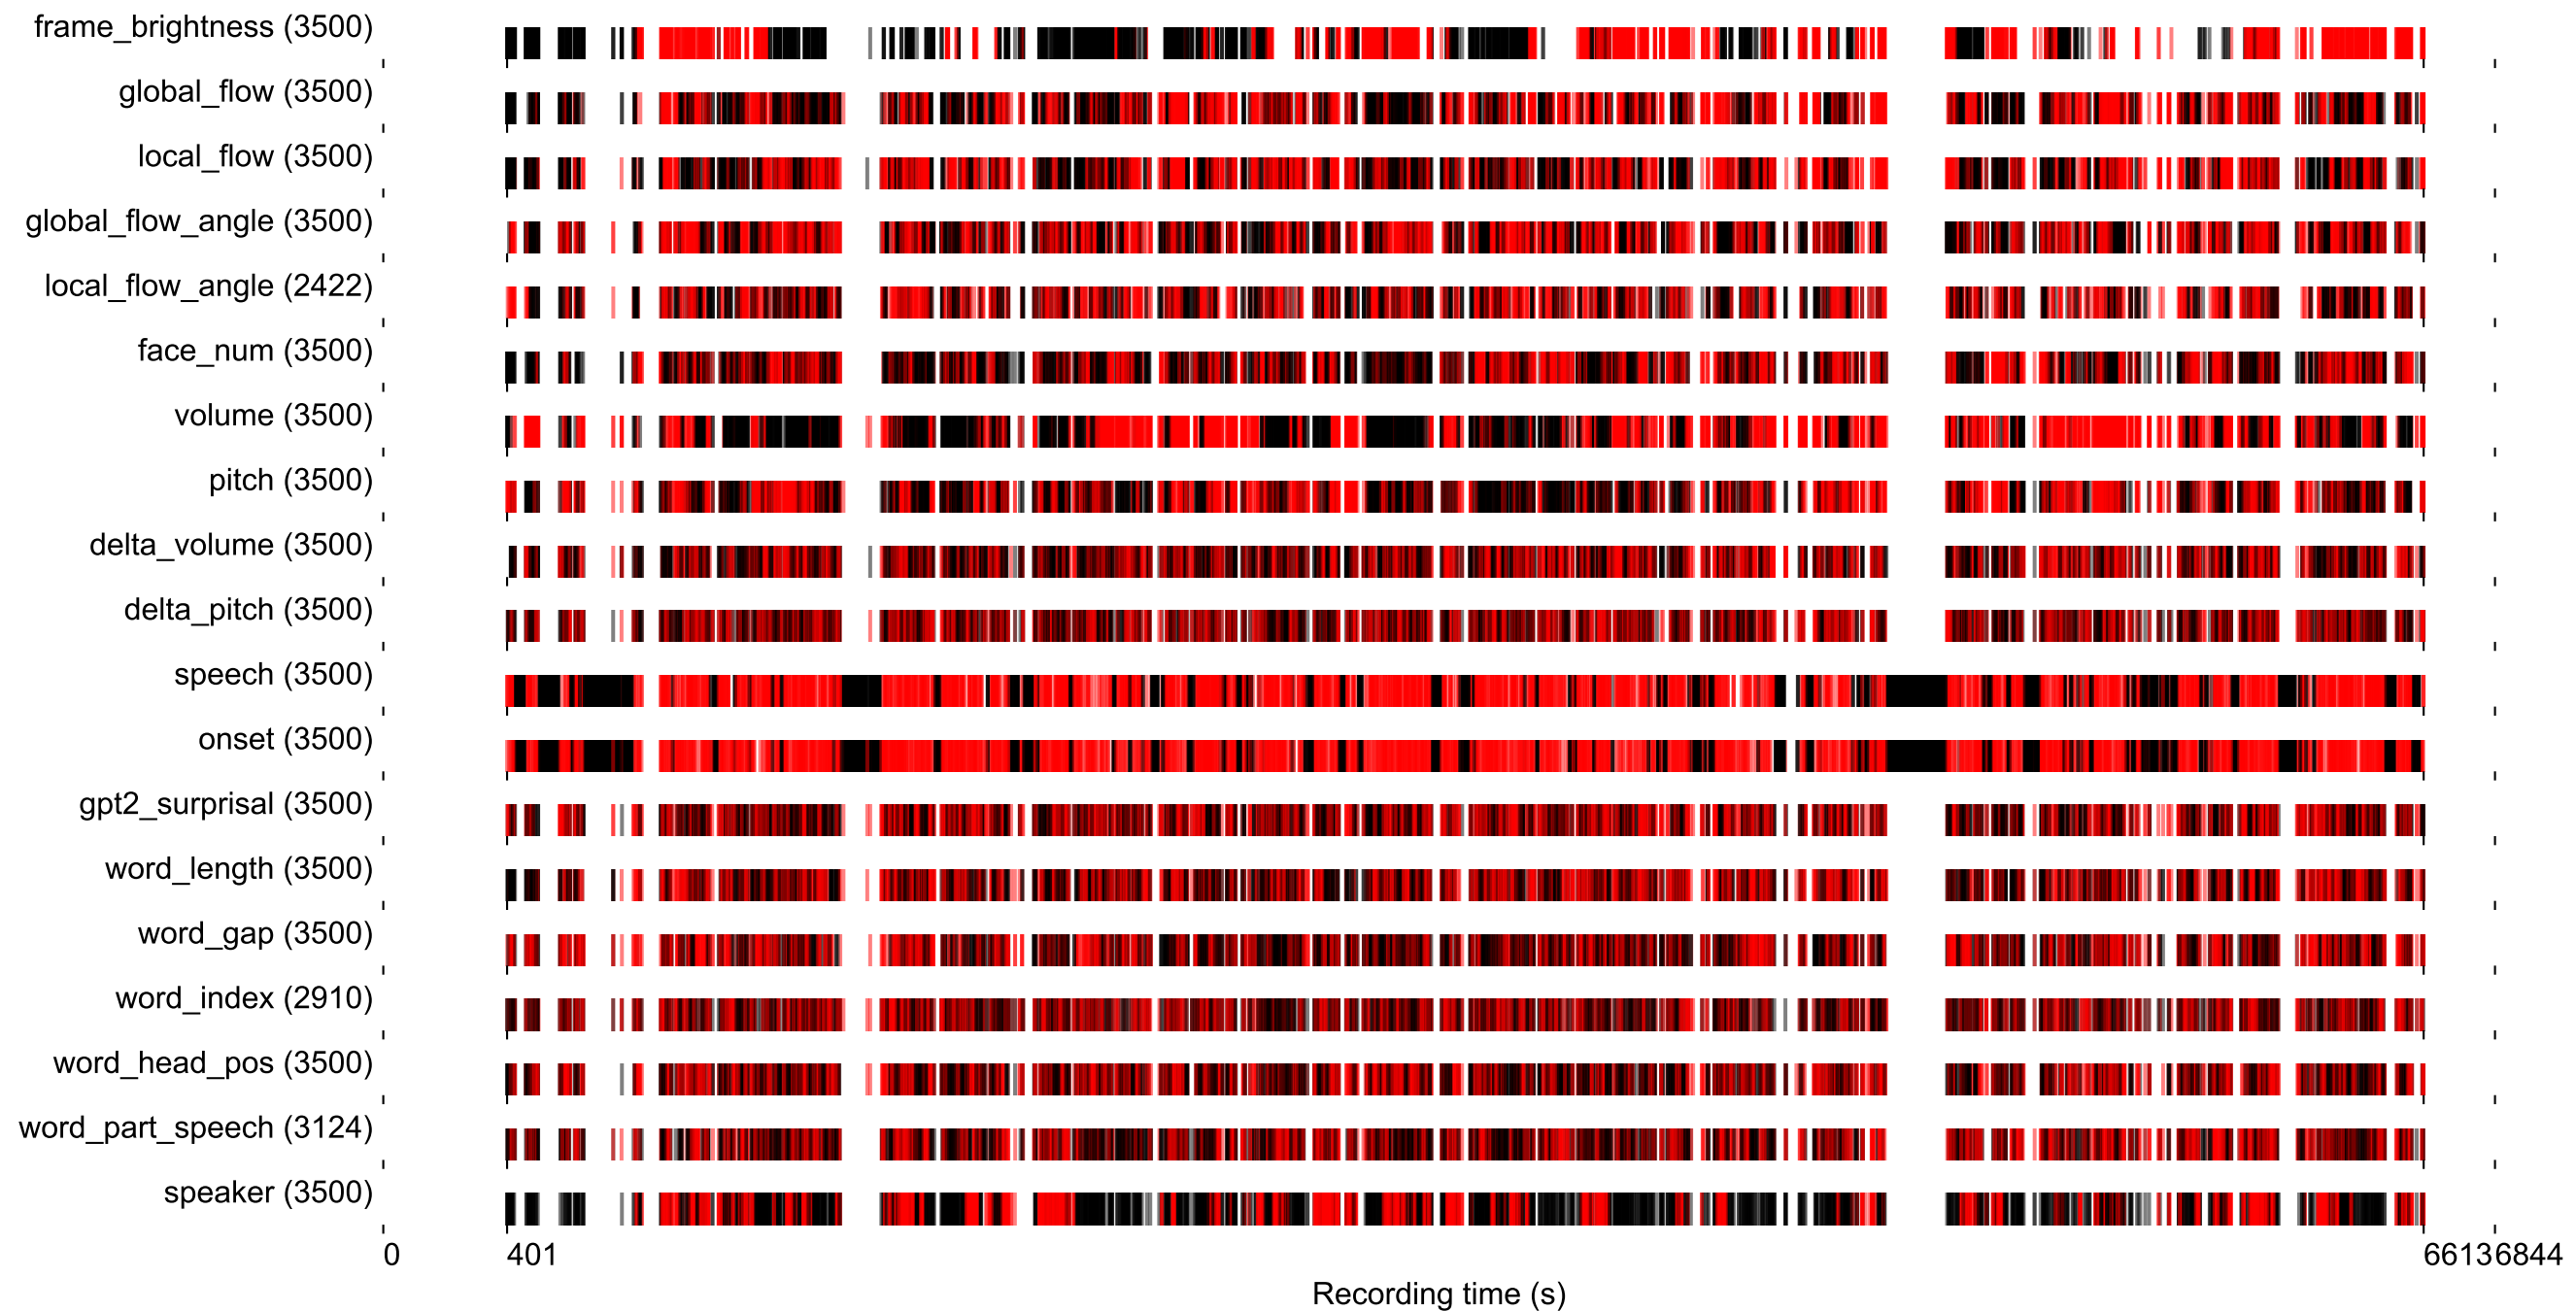

Supplement: supplementary_material [file btbank3_0_cars-2.pdf › neuroprobe_iclr_2026_anonymized-master/analyses/task_coverage_of_sessions/btbank3_0_cars-2.pdf]

Task coverage for btbank3\_1 (lotr-1)

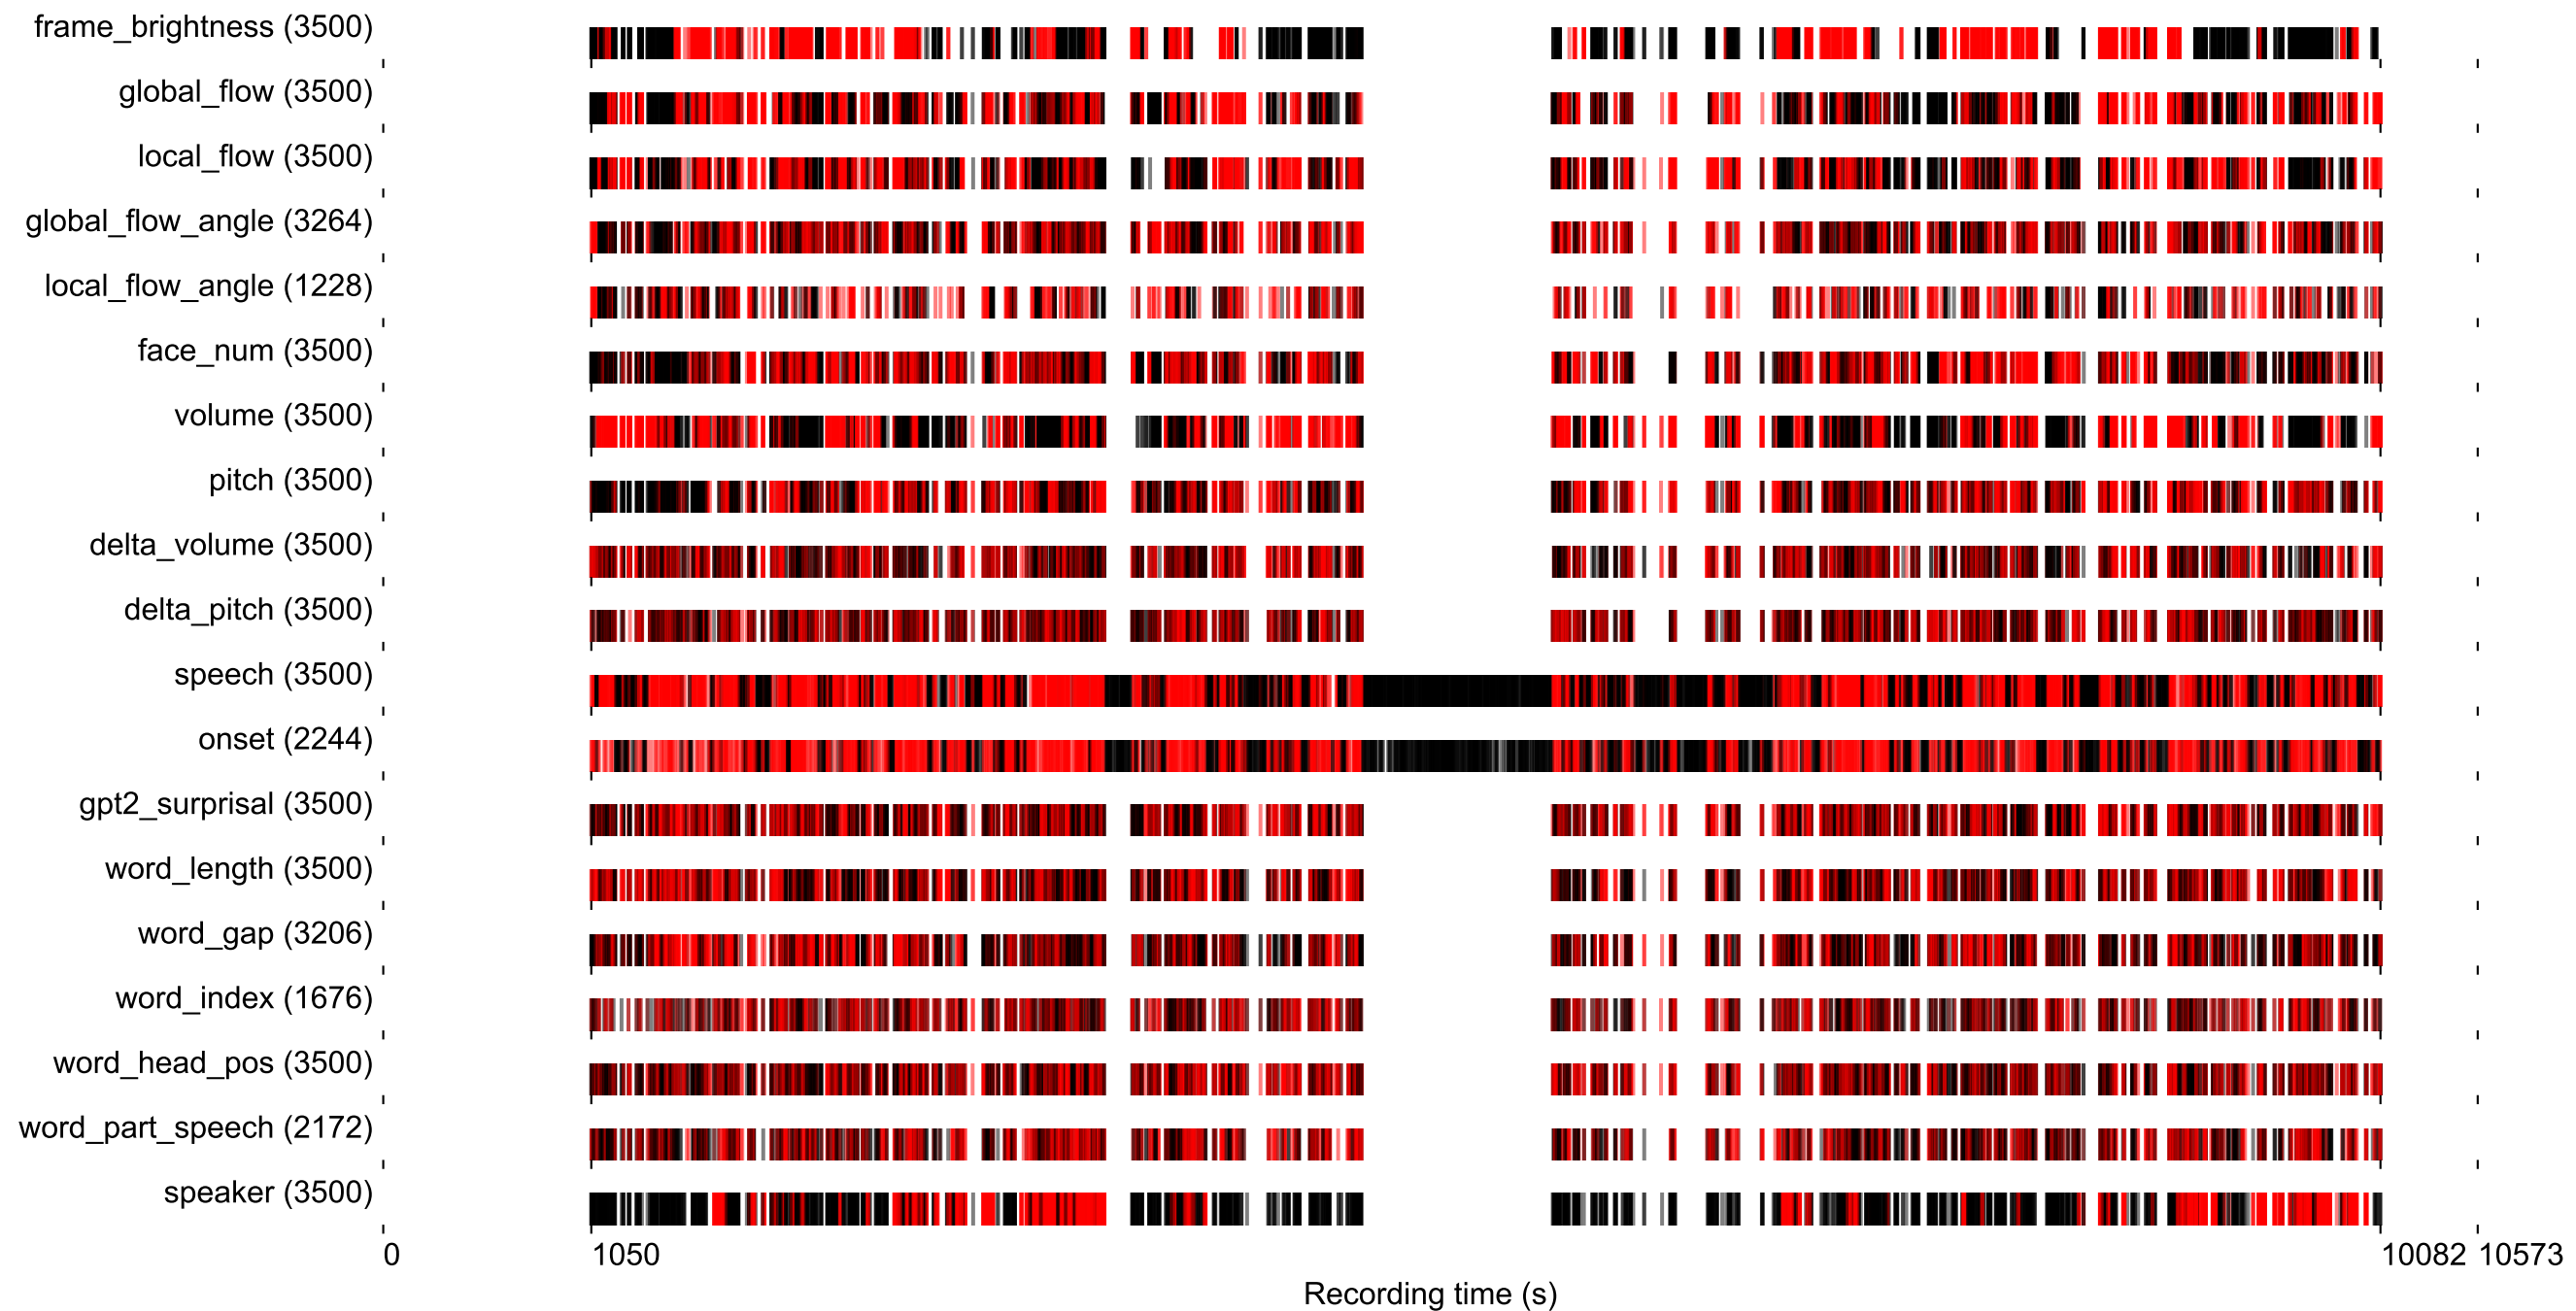

Supplement: supplementary_material [file btbank3_1_lotr-1.pdf › neuroprobe_iclr_2026_anonymized-master/analyses/task_coverage_of_sessions/btbank3_1_lotr-1.pdf]

Task coverage for btbank4\_0 (shrek-the-third)

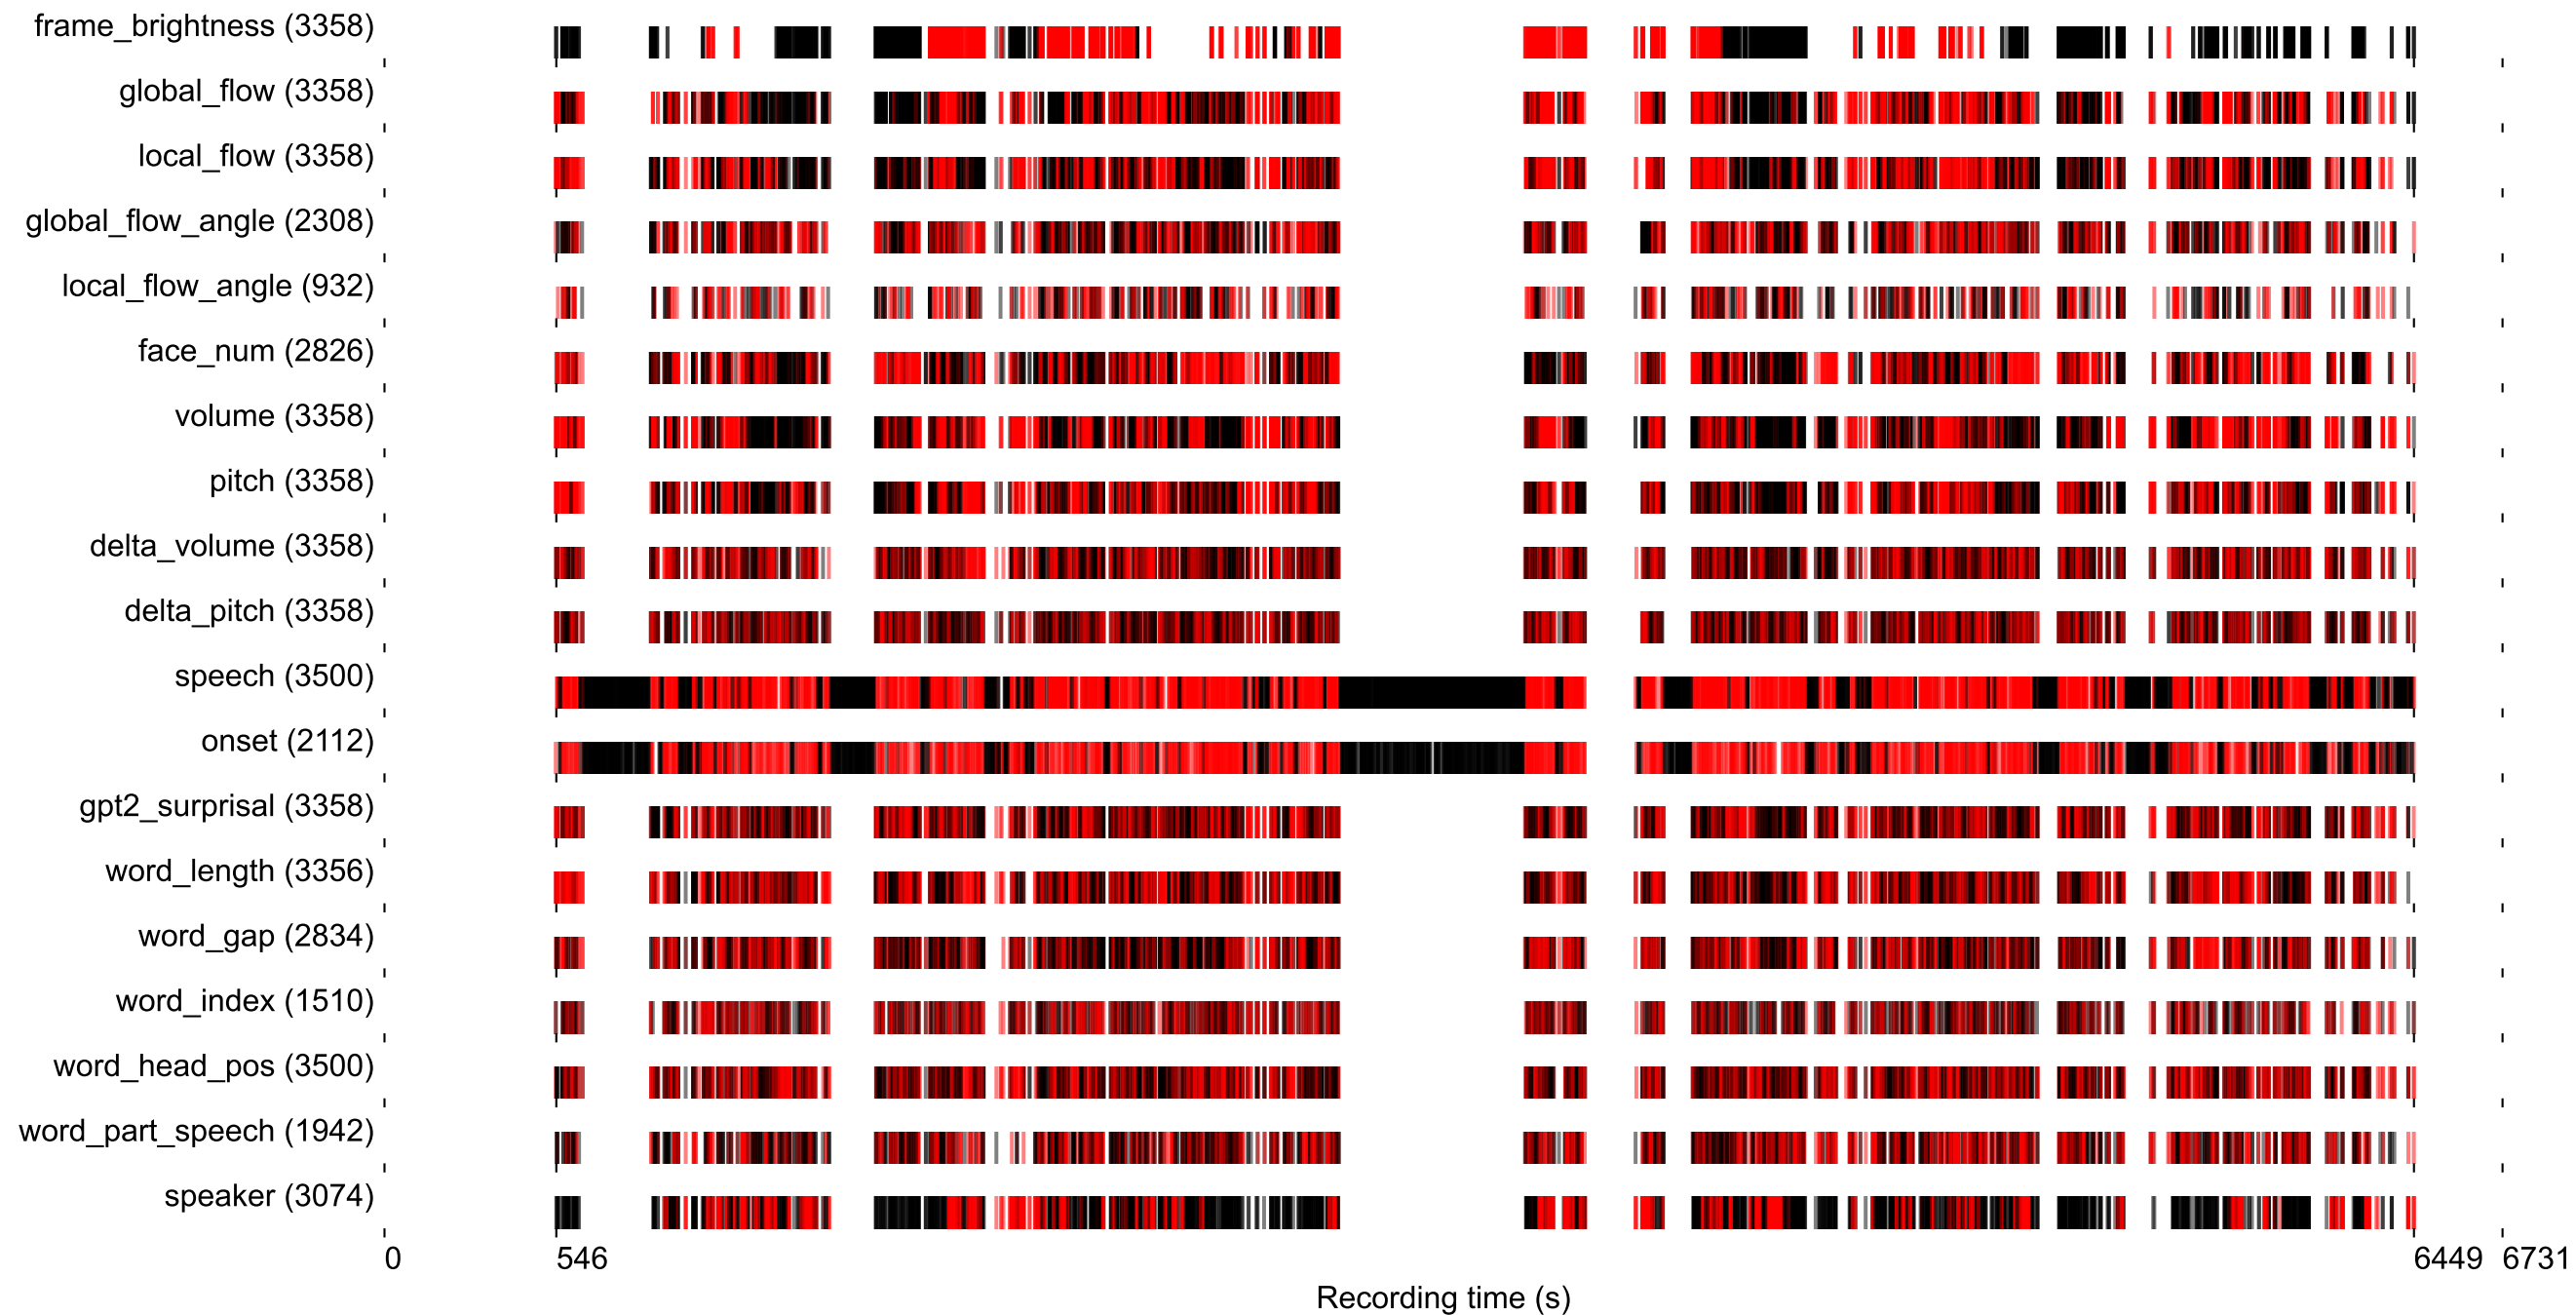

Supplement: supplementary_material [file btbank4_0_shrek-the-third.pdf › neuroprobe_iclr_2026_anonymized-master/analyses/task_coverage_of_sessions/btbank4_0_shrek-the-third.pdf]

Task coverage for btbank4\_1 (megamind)

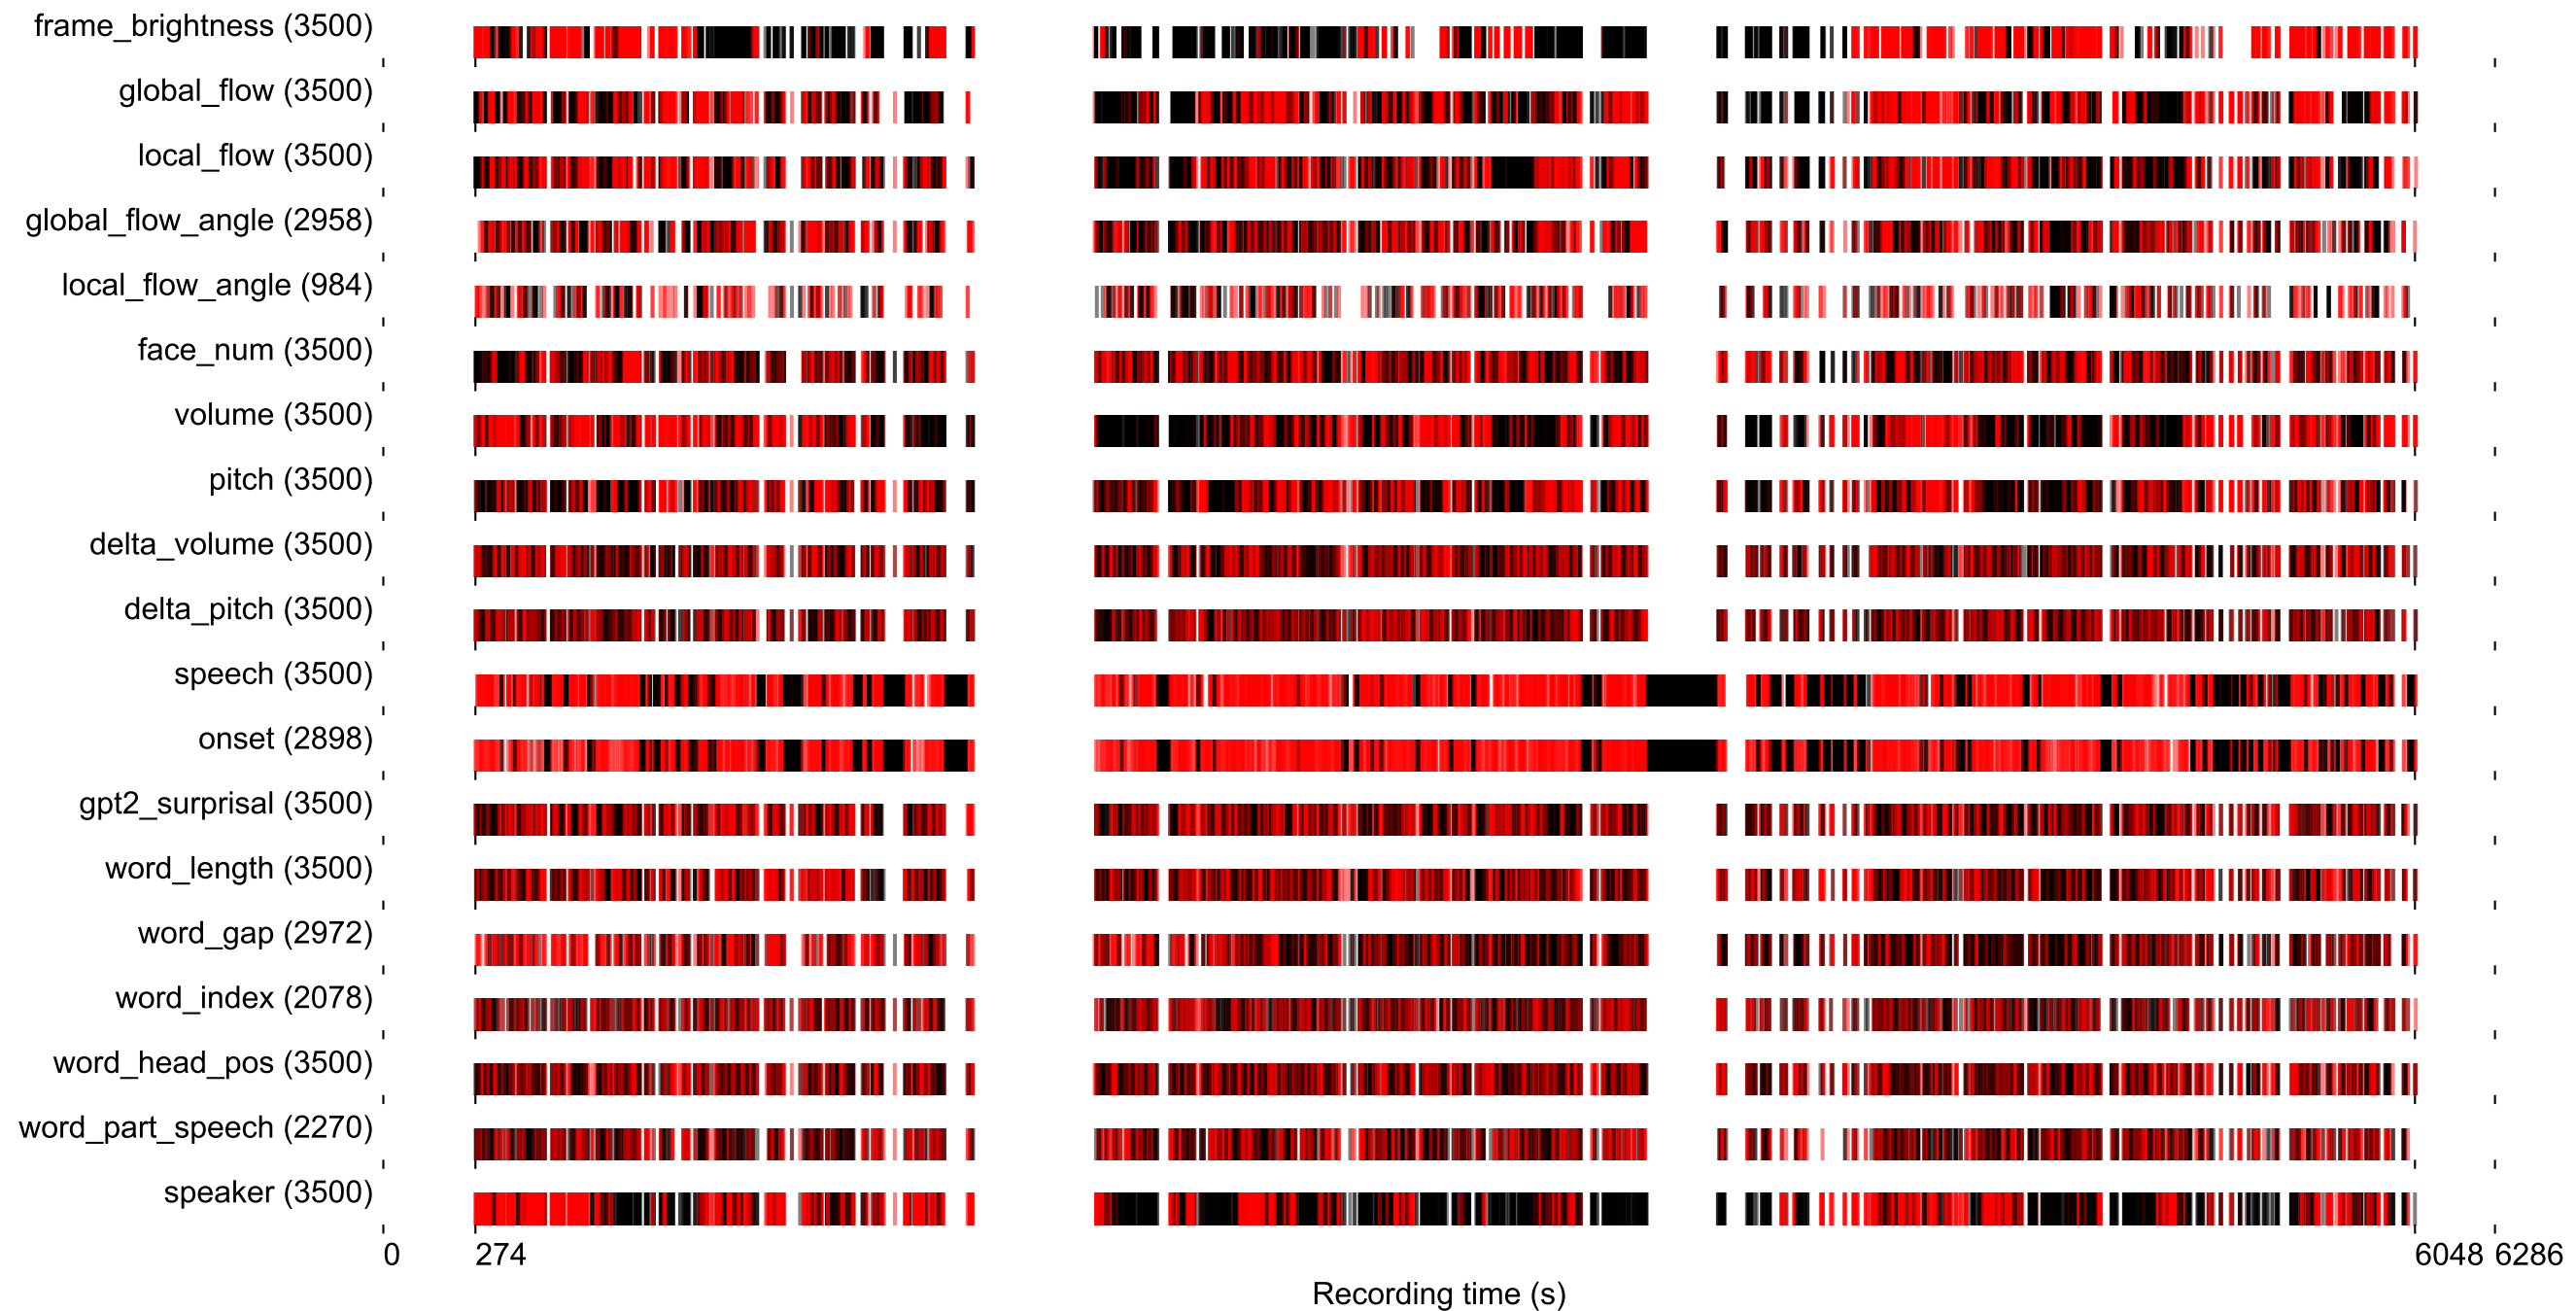

Supplement: supplementary_material [file btbank4_1_megamind.pdf › neuroprobe_iclr_2026_anonymized-master/analyses/task_coverage_of_sessions/btbank4_1_megamind.pdf]

Task coverage for btbank7\_0 (cars-2)

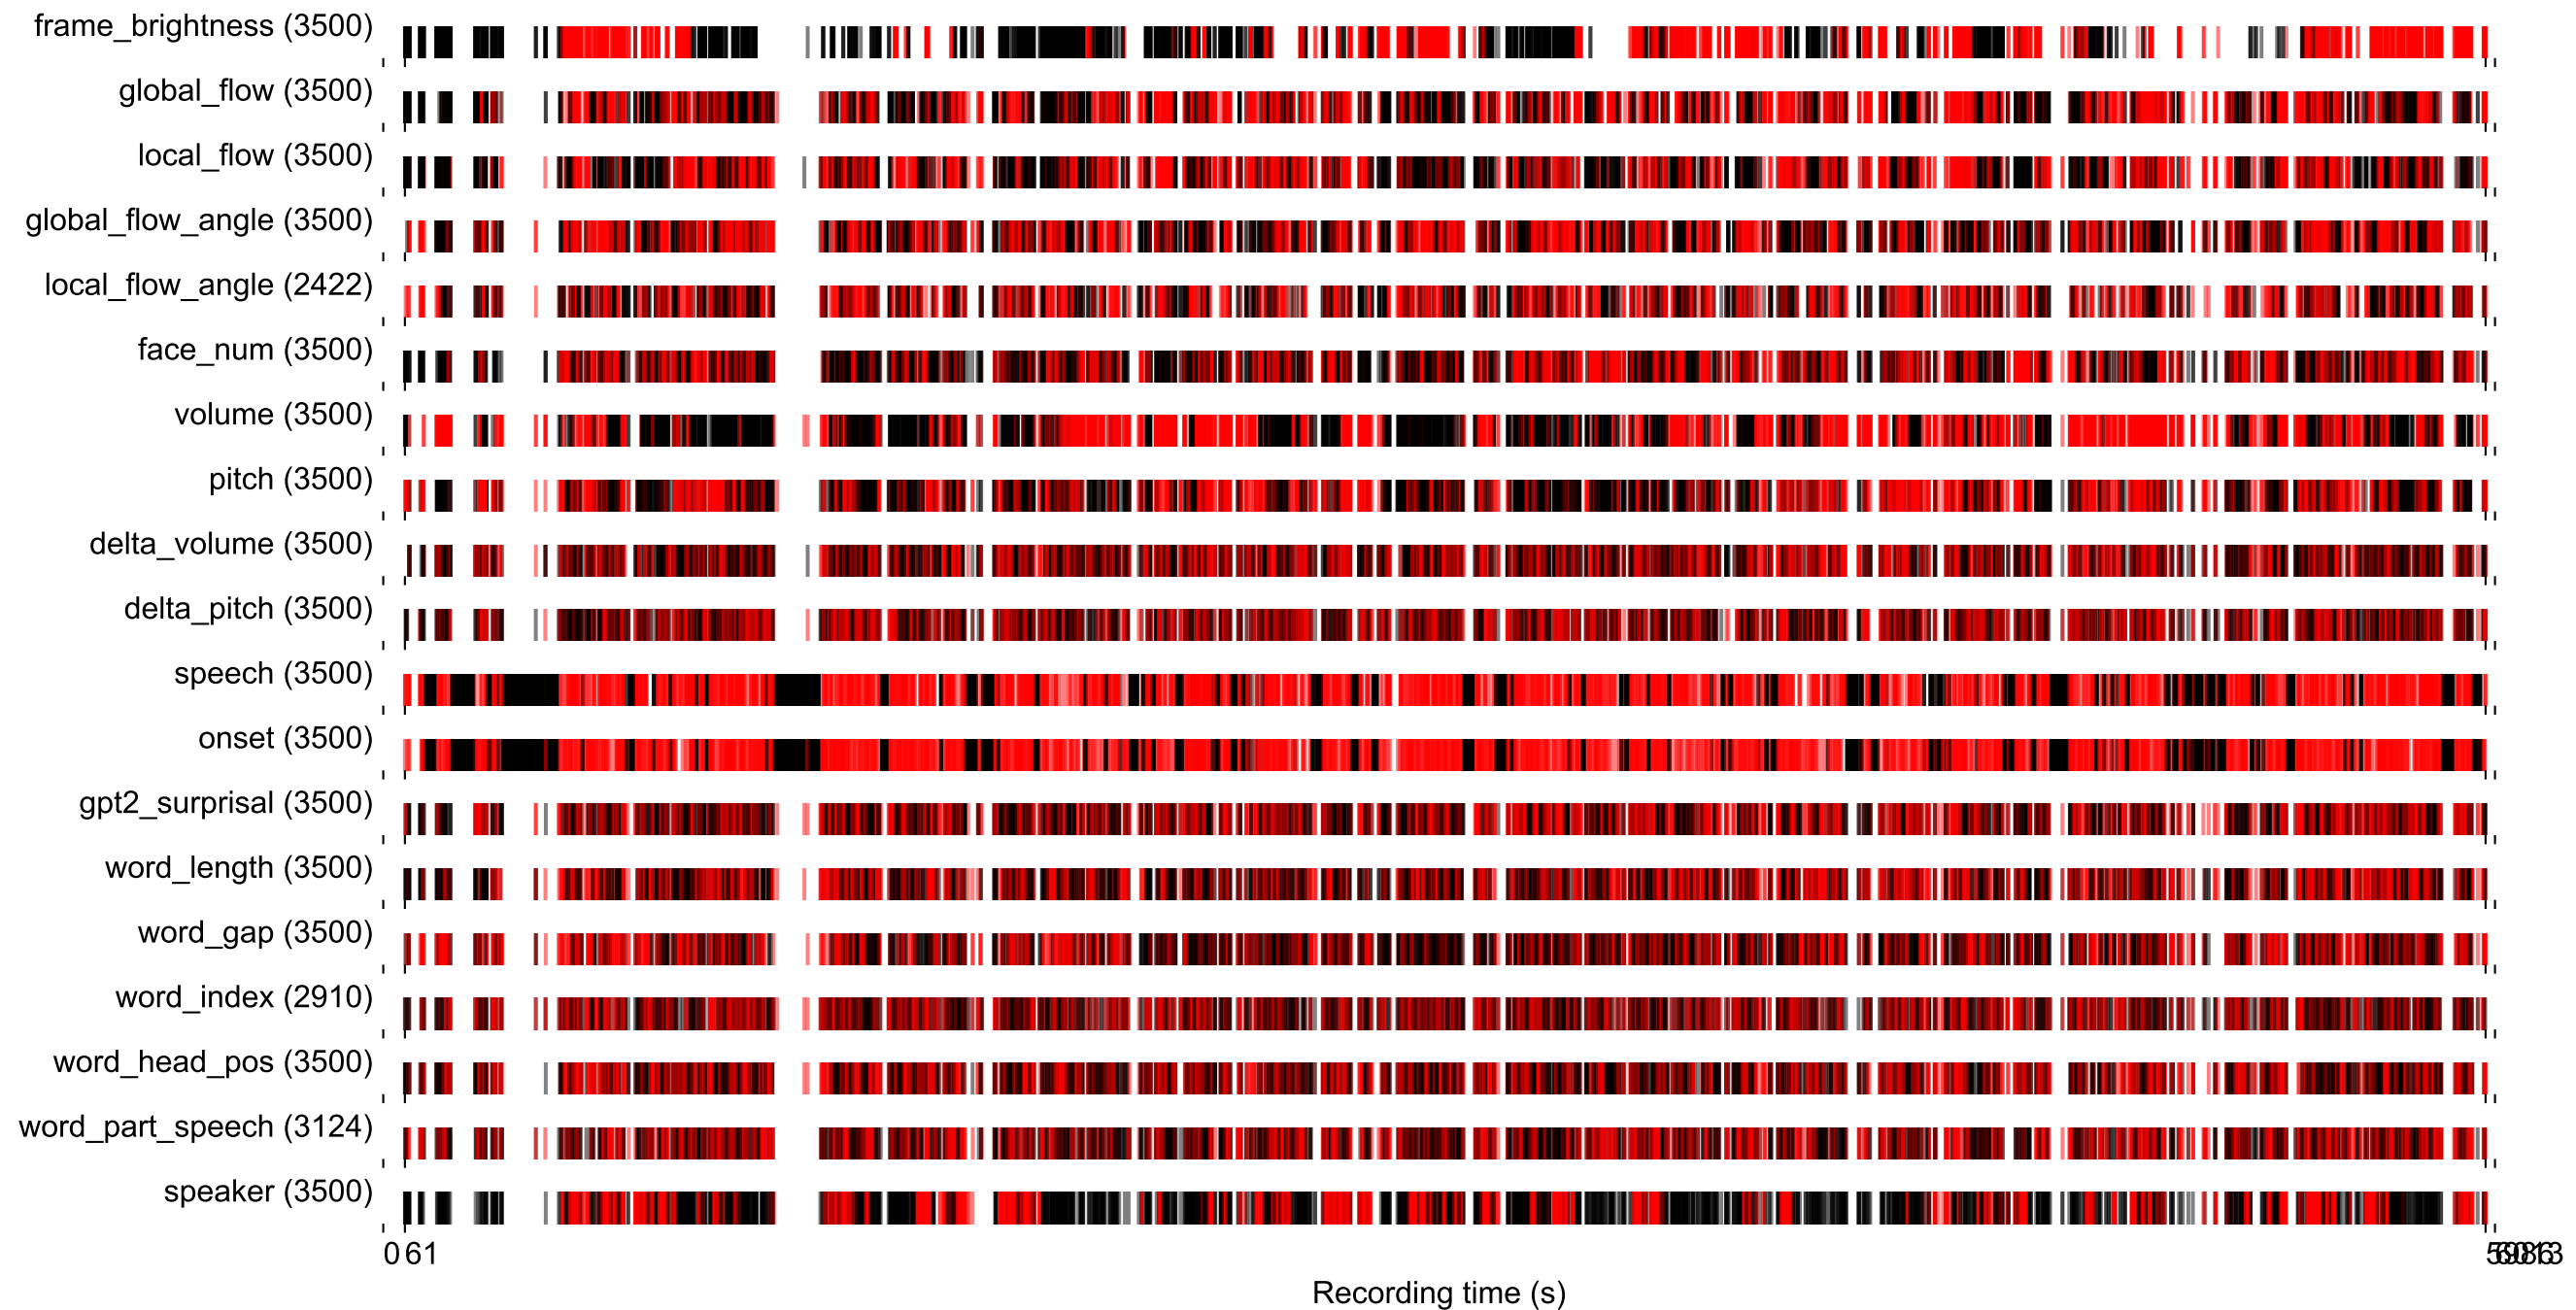

Supplement: supplementary_material [file btbank7_0_cars-2.pdf › neuroprobe_iclr_2026_anonymized-master/analyses/task_coverage_of_sessions/btbank7_0_cars-2.pdf]

Task coverage for btbank7\_1 (megamind)

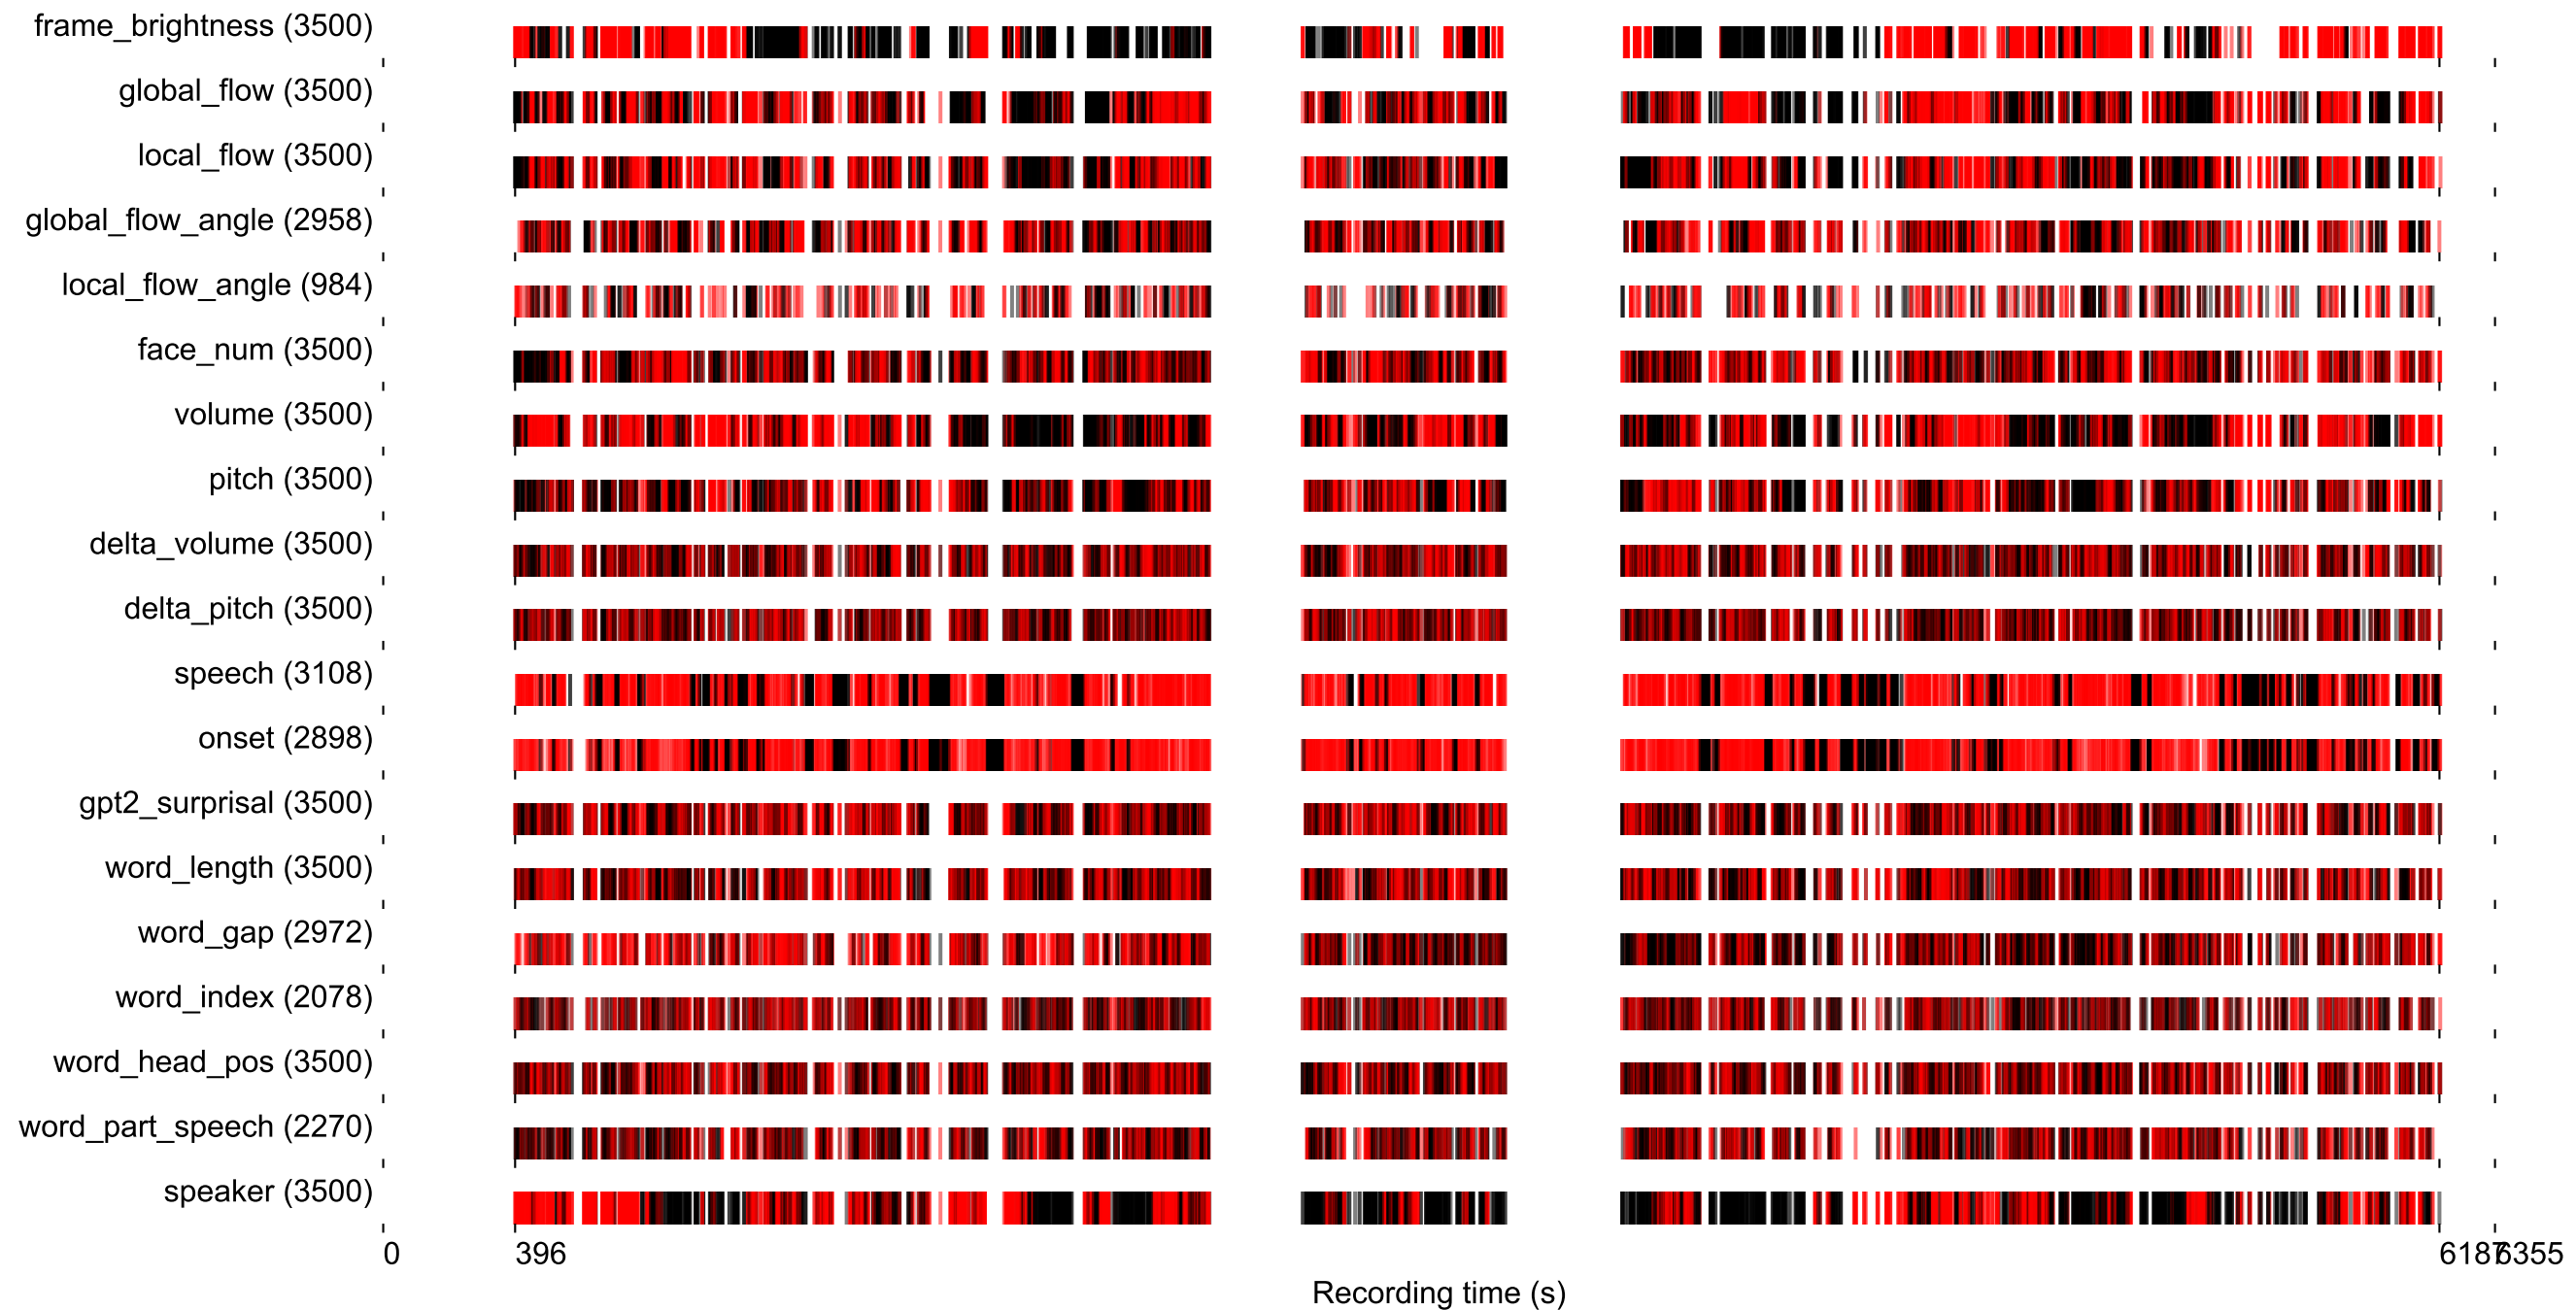

Supplement: supplementary_material [file btbank7_1_megamind.pdf › neuroprobe_iclr_2026_anonymized-master/analyses/task_coverage_of_sessions/btbank7_1_megamind.pdf]
